1 **A KDM4A-PAF1-mediated epigenomic network is essential for acute myeloid leukemia**  
2 **cell self-renewal and survival**

3

4 Running title: Epigenomic regulation by KDM4A in human AML

5

6 Matthew E Massett<sup>1</sup>, Laura Monaghan<sup>1</sup>, Shaun Patterson<sup>1</sup>, Niamh Mannion<sup>1</sup>, Roderick P  
7 Bunschoten<sup>2</sup>, Alex Hoose<sup>2</sup>, Sandra Marmioli<sup>3</sup>, Robert MJ Liskamp<sup>2</sup>, Heather G Jørgensen<sup>1</sup>,  
8 David Vetrie<sup>4</sup>, Alison M Michie<sup>1</sup>, Xu Huang<sup>1, ¶</sup>

9 <sup>1</sup> Paul O’Gorman Leukaemia Research Centre, Institute of Cancer Sciences, University of  
10 Glasgow, Glasgow, United Kingdom.

11 <sup>2</sup> Medicinal Chemistry Department, Joseph Black Building, School of Chemistry, University of  
12 Glasgow, Glasgow, United Kingdom.

13 <sup>3</sup> Cellular Signalling Unit, Department of Biomedical, Metabolic and Neural Sciences,  
14 University of Modena and Reggio Emilia, Modena 41125, Italy.

15 <sup>4</sup> Wolfson Wohl Cancer Research Centre, Institute of Cancer Sciences, University of  
16 Glasgow, Glasgow, United Kingdom.

17

18 ¶ Corresponding author:

19 Xu Huang

20 Hemato-oncology/Systems medicine group

21 Paul O’Gorman Leukaemia Research Centre

22 University of Glasgow, 1053 Great Western Road, Glasgow, G12 0ZD, United Kingdom.

23 [xu.huang@glasgow.ac.uk](mailto:xu.huang@glasgow.ac.uk)

24 Telephone: +44 141 301 7884

25 FAX: +44 141 301 7880

26

27

28 **Abstract**

29 Epigenomic dysregulation is a common pathological feature in human hematological  
30 malignancies. H3K9me3 emerges as an important epigenomic marker in acute myeloid  
31 leukemia (AML). Its associated methyltransferases, such as SETDB1, suppress AML  
32 leukemogenesis, whilst H3K9me3 demethylases KDM4C is required for mixed lineage  
33 leukemia rearranged AML. However, the specific role and molecular mechanism of action of  
34 another member of KDM4 family, KDM4A has not previously been clearly defined. In this  
35 study, we delineated and functionally validated the epigenomic network regulated by  
36 KDM4A. We show that selective loss of KDM4A is sufficient to induce apoptosis in a broad  
37 spectrum of human AML cells. This detrimental phenotype results from a global  
38 accumulation of H3K9me3 and H3K27me3 at KDM4A targeted genomic loci thereby causing  
39 down-regulation of a *KDM4A-PAF1* controlled transcriptional program essential for  
40 leukemogenesis, distinct from that of KDM4C. From this regulatory network, we further  
41 extracted a *KDM4A-9* gene signature enriched with leukemia stem cell activity; the *KDM4A-9*  
42 score alone or in combination with the known *LSC17* score, effectively stratifies high-risk  
43 AML patients. Together, these results establish the essential and unique role of KDM4A for  
44 AML self-renewal and survival, supporting further investigation of KDM4A and its targets as a  
45 potential therapeutic vulnerability in AML.

46

47

48

49

50

51

52

53

54 **Introduction:**

55 Acute myeloid leukemia (AML) is an aggressive blood cancer affecting mostly adult and  
56 elderly patients. Growing evidence recognises that aberrant epigenetic-lead transcriptional  
57 regulation, such as hypermethylation at CpG islands (1) or H3K79me2 (2), and  
58 hypomethylation at H3K4me3 (3) and H3K9me3 (4) contributes to AML  
59 initiation/maintenance. Corroborating this notion, pharmacological epigenetic inhibitors, such  
60 as DNA methylase inhibitor, azacytidine (1, 5) have received regulatory approval for the  
61 treatment of myelodysplastic syndrome. Therefore, investigation of molecular mechanisms  
62 underpinning the epigenetic dysregulation in AML contributing to leukemogenesis is of  
63 importance, as it may uncover leukemic dependent transcriptional network(s), the core gene  
64 signature of which could be used as potential biomarkers for AML patient stratification and/or  
65 prognostic predication.

66 The H3K9 methyltransferases, such as SETDB1, have been shown to negatively regulate  
67 AML leukemogenesis (6). The previously observed association between global H3K9me3  
68 hypomethylation in primary AML blasts and adverse outcome of patient prognosis (4) further  
69 suggests a potential role of H3K9me3 associated epigenetic modifying enzymes in AML.  
70 Cheung *et al.* further identified a H3K9me3 demethylase, KDM4C as a cofactor of PRMT1  
71 involved transcriptional complex in mixed-lineage leukemia rearranged (MLLr) and MOZ-  
72 TIF2 AML (7). In addition, simultaneous knockout (KO) of all three members of Kdm4 family  
73 (*kdm4a/b/c*) in *B6.SJL* mice led to a strong attenuation of MLL-AF9 AML(8), indicative of  
74 roles for the Kdm4 family in murine myeloid leukemia. However, the roles and therapeutic  
75 tractabilities of other individual members of the KDM4 family in human AML are not well  
76 understood.

77 We previously performed a lentiviral knockdown (KD) screen targeting individual putative  
78 epigenetic regulators in 12 human AML cell lines representing different molecular subgroups  
79 of AML and found that depletion of one KDM4 family member, KDM4A, lead to significant

80 suppression of leukemia cell proliferation (9). Substantial evidence establishes that KDM4A  
81 has different roles in normal tissue development compared to other members of the KDM4  
82 family; it is amplified/overexpressed in various malignancies including AML and correlates  
83 with poor outcome in ovarian cancer (10, 11). Therefore, we tested the hypothesis that  
84 human KDM4A drives a distinct oncogenic mechanism compared to that known for KDM4C  
85 in human myeloid leukemia. Herein we demonstrate that selective loss of KDM4A is  
86 sufficient to induce AML cell death. This detrimental phenotype results from a global  
87 accumulation of epigenetic modifications, H3K9me3 and H3K27me3 at KDM4A targeted  
88 genomic loci thereby causing differential regulation of a *KDM4A*-mediated selective  
89 transcriptional program, including a minimum 9-gene signature enriched with leukemia stem  
90 cell (LSC) activity, which can effectively stratify high-risk patients. These findings support an  
91 essential and unique role of KDM4A for AML cell self-renewal and survival.

92

## 93 **Materials and Methods**

94

### 95 **Reagents, plasmids and virus manufacture**

96 Puromycin and IOX1<sup>dev</sup> were purchased from Sigma-Aldrich (St. Louis, MO, USA). IOX1 was  
97 from Tocris (#4464). pLenti-HA-KDM4A wt and mut (H188A/E190A) were a gift from Dr Gary  
98 Spencer (CRUK Manchester Institute). Lentiviral constructs for KD experiments were  
99 purchased from Sigma-Aldrich and are listed in the Supplemental Table. Lentiviral and  
100 retroviral supernatants were prepared, and leukemic human and murine cells transduced  
101 with viral particles as previously described (9).

### 102 **Flow cytometry, apoptosis and cell cycle analyses and immunoblotting**

103 Flow cytometry analyses were performed using an LSRII flow cytometer (BD Biosciences,  
104 Oxford, UK). Cell sorting were performed using an Aria III flow cytometer (BD Biosciences).

105 Details of antibodies used in flow cytometry and immunoblotting/immunoprecipitation are in  
106 the Supplemental Table.

### 107 **Immunofluorescence staining**

108 Immunofluorescence (IF) staining was carried out using Hendley-Essex 12 well glass  
109 microscope slides.  $6 \times 10^4$  cells per condition were incubated on a poly-L-lysine coated slide  
110 for 1 hr before being fixed in 4% formaldehyde in PBS. The cells were permeabilized in 0.5%  
111 Triton-X-100 PBS followed by 2 hrs of blocking in 5% BSA, 0.2% Triton-X-100 TBS. Primary  
112 antibody diluted 1:500 in blocking solution was applied and slides incubated overnight in a  
113 humidified chamber at 4°C. Primary antibody was removed using PBS 0.1% Tween 20  
114 (PBST) before a 1 hr room temperature incubation in appropriate secondary antibody (1:500  
115 dilution in blocking solution) The antibody was again removed by washing with PBST.  
116 Antifade mountant with DAPI reagent (Thermo Fisher #P36962) was applied to each sample  
117 and a coverslip applied. After drying the slides were sealed and images captured at 40x/100x  
118 magnification on the Zeiss Axioimager M1 Epifluorescence and Brightfield Microscope.

### 119 **Culture of cell lines and primary cells**

120 Leukemia cell lines were from DMSZ (Braunschweig, Germany). All cell lines were grown in  
121 the recommended cell culture media at 37°C in 5% CO<sub>2</sub>. Murine and human primary AML  
122 and normal BM samples were cultured as described (12). Murine MLL-AF9 AML cells were  
123 leukemic BM cells extracted from a cohort of mice with MLL-AF9 AML established by  
124 Somervaille et al (13), and cultured in the conditional medium with mIL-3 (100ng/ml). All  
125 cytokines were purchased from PeproTech (London, UK).

### 126 **Colony forming cell assay**

127 Colony forming cell (CFC) assay for murine cells was performed by plating 1000 cells on  
128 methylcellulose (MethoCult #M3434, Stem Cell Technologies). Colony Assay for human  
129 CD34<sup>+</sup> HSPCs and AML patient cells were performed by plating 10000 cells and 3000 cells  
130 respectively on methylcellulose (MethoCult #H4434, Stem Cell Technologies). CFU-GM

131 (Granulocyte/Macrophage), M(Macrophage), and E(Erythroid) colonies were assessed and  
132 counted 10 days after seeding.

### 133 **Murine transplantation experiments**

134 Experiments using mice were approved by the local animal ethics review board and  
135 performed under a project licence issued by the United Kingdom Home Office, in keeping  
136 with the Home Office Animal Scientific Procedures Act, 1986. Non-obese diabetic. Cg-Prkdc  
137 scid Il2rgtm1Wjl/SzJ (NSG) mice were purchased from Jackson Laboratories (Bar Harbor,  
138 ME, USA) for transplantation as previously described (9). Briefly, indicated primary AML  
139 patient samples for xenograft transplantation were unfractionated primary blasts from our and  
140 Manchester biobank collections. Control or *KDM4A* KD human AML THP1 cells or primary  
141 AML patient blasts were FACS sorted 40 hours following lentiviral infection and immediately  
142 transplanted into sub-lethally irradiated (450cGy) NSG mice (10,000 THP1 cells or 10<sup>6</sup>  
143 primary AML cells) via tail vein injection.

### 144 **RNA isolation, quantitative PCR, RNA-seq and ChIP-seq**

145 AML cells were transduced as previously described with two distinct lentiviruses for *KDM4A*  
146 KD (*KDM4A* KD#1 and *KDM4A* KD#2) and two for *PAF1* KD (Supplemental Table-2). A non-  
147 targeting control (NTC) lentivirus was used as a control. RNA was extracted from transduced  
148 cells 72 hr following puromycin selection using QIAshredder™ columns and the RNeasy Plus  
149 Microkit™ (Qiagen). RNA-seq libraries were produced using the TruSeq® stranded mRNA kit  
150 (Illumina) and sequenced using the Illumina NextSeq™ 500 platform. For ChIP-seq, DNA  
151 was purified using Diagenode's iPure kit v2 and libraries made using the TruSeq ChIP  
152 Library Preparation Kit according to the manufacturer's instructions. FastQC was used to  
153 inspect and ensure the quality of sequencing data. Independent experiments of QPCR and  
154 ChIP-QPCR were carried out for RNA-seq and ChIP-seq validation. Details of RNA-seq and  
155 ChIP-seq data analysis and *KDM4A-9* gene signature construction methods are in the  
156 Supplemental Methods. RNA-seq and ChIP-seq data files are available in the Gene

157 Expression Omnibus (GEO): GSE125376. For gene expression correlation and survival  
158 analyses, processed datasets were downloaded from public databases: (i) E-MTAB-3322 (7)  
159 (ii) GSE81299 (8) (iii) GSE6891 (14) (iv) GSE12417 (15) (v) GSE37642 (16) (vi) Vizome (17)  
160 (vii) COSMIC (18).

## 161 **Study Approval**

162 Use of human tissue was in compliance with the ethical and legal framework of the United  
163 Kingdom's Human Tissue Act (2004) and the Human Tissue (Scotland) Act (2006). Normal  
164 CD34<sup>+</sup> mobilized HSPC surplus to requirements were from patients undergoing  
165 chemotherapy and autologous transplantation for lymphoma and myeloma. Their use was  
166 authorized by the Salford and Trafford Research Ethics Committee and, for samples  
167 collected since 2006, following the written informed consent of donors. Normal human BM  
168 was collected with informed consent from healthy adult male donors, with the ethical  
169 approval of the Yorkshire Independent Research Ethics Committee.

170 Primary human AML samples were from Manchester Cancer Research Centre's Tissue  
171 Biobank (instituted with approval of the South Manchester Research Ethics Committee) and  
172 Paul O'Gorman Leukaemia Research Centre's hematological cell research biobank (with  
173 approval of the West of Scotland Research Ethics Committee 4). Their use was authorized  
174 following project review by the Research Tissue Biobank's scientific sub-committee, and with  
175 the informed consent of donors.

## 176 **Statistical analysis**

177 Survival probabilities were estimated using the Kaplan-Meier method (survival 2.43-3 and  
178 survminer 0.4.3 R packages) and compared with the log-rank test. To dichotomize patients  
179 as either having a high or low signature score a median cut-off was utilized. For the  
180 differential expression of *KDM4A-9* genes between  $KDM4A^{\text{high}}$  and  $KDM4A^{\text{low}}$  patients, Welch  
181 t-test was used. Normally distributed groups were compared using two-tailed student *t*-test,  
182 unless stated otherwise. Correlation analysis was performed using Pearson's correlation.

183 Statistics were calculated using R-3.6.1. Statistical significance of differential gene  
184 expression was assessed by Welch's t-test unless otherwise stated. For RNA-seq,  
185 differential expression analysis was performed using the DESeq2 1.26.0 R package.

## 186 **Results**

187

### 188 **KDM4A is required for the survival of human and murine AML cells**

189 Data from COSMIC (18) show that up to 3.62% AML patient samples were found to exhibit  
190 elevated KDM4A expression (Fig. S1A), and its expression is significantly different from  
191 those of other KDM4 family members (Fig. S1B), indicative of a distinct role. Although there  
192 is no significant association of *KDM4A* expression with any other existing risk factors of AML  
193 (data not shown), such as specific oncogenic mutations or cytogenetic features, its  
194 expression is found highly enriched in AML-LSC<sup>+</sup> populations (Fig. S1C), suggesting that  
195 KDM4A may be important for maintenance of the LSC pool, the presence and size of which  
196 is negatively correlated with AML patient survival.

197 To define a distinctive functional requirement of KDM4A in human AML cells, we performed  
198 lentivirus shRNA KD of *KDM4A*, *KDM4B* and *KDM4C* in human AML THP1 cells. THP1 cells  
199 driven by MLL fusion gene, have high levels of expression of KDM4A and have previously  
200 been used in our targeted depletion screen of chromatin regulatory genes (9). Furthermore,  
201 two previous studies of MLLr-driven leukemia had examined the function of other KDM4  
202 family members (7, 8) allowing us to assess and compare the role of KDM4A in this AML  
203 subtype. *KDM4A* KD THP1 cells exhibited the greatest decrease in cell proliferation  
204 compared to NTC cells, using KD of *MLL* and *MEN1*, as positive controls (Figs. 1A-1C).  
205 Consistent with previously published work, lentiviral KD of *KDM4C* also had an inhibitory  
206 effect on AML cell proliferation (7), while *KDM4B* KD had no effect (Figs. 1A). Substantial  
207 loss of colony forming cell (CFC) potential in methylcellulose assays was correlated with the  
208 expression of *KDM4A* in a dose-dependent manner when five distinct *KDM4A* KD shRNA



209 targeting constructs were compared (Fig. 1D). *KDM4A* KD induced apoptosis (Figs. 1E &  
210 S1D) rather than cell cycle arrest (Fig. S1E), with a small but consistent increase of myeloid  
211 cell surface markers CD13 and CD86 (19) expression relative to NTC (Fig. S1F), suggesting  
212 that loss of *KDM4A* may promote myeloid differentiation in THP1 cells. The requirement of  
213 *KDM4A* for the survival of AML cells was further confirmed in primary MLLr-AML patient  
214 blasts (Figs. 1F & 1G) and murine MLL-AF9 AML cells (Fig. 1H). Importantly, we determined  
215 the impact of *KDM4A* KD on AML initiation *in vivo* by transplanting *KDM4A* KD THP1 cells  
216 (Fig. 1I) or primary MLLr-AML cells (Figs. 1J-1K & S1G-S1I) into recipient NSG mice. Control  
217 (NTC) cells induced short latency disease within 40 days with splenomegaly (Fig. 1K). Loss  
218 of *KDM4A* significantly prolonged overall survival of mice with only one mouse succumbing  
219 to leukemia over the follow-up period by either *KDM4A#1* KD or *KDM4A#2* KD (Figs. 1J-1K  
220 & S1G-S1I). Taken together, these data demonstrate a specific and essential role for *KDM4A*  
221 in AML cell survival.

## 222 **Targeting *KDM4A*'s demethylase activity inhibits AML cell proliferation**

223 Next, we wanted to determine whether the catalytic demethylase activity of *KDM4A* is  
224 required for AML cells, we performed functional rescue experiments using murine MLL-AF9  
225 cells. Forced-expression of wild-type human *KDM4A* rescued the clonogenic activity of AML  
226 cells transduced with *kdm4a* KD virus (Figs. 2A & 2B). However, this rescue phenotype was  
227 not observed when an enzymatically inactive mutant of human *KDM4A*  
228 (*KDM4A*<sup>H188A/E190A</sup>)(20, 21) (Figs. 2A & 2B) was expressed in murine MLL-AF9 cells. We  
229 further directly assessed the ability of *KDM4A* demethylase activity to modulate levels of  
230 H3K9me3 and H3K36me3 by examining the global changes of these established *KDM4A*  
231 substrates as readouts in *KDM4A* KD THP1 cells. As expected, there was a marked increase  
232 in the H3K9me3 level shown by immunoblotting (Figs. 2C & 2D) and an accumulation of  
233 H3K9me3 signal shown by immunofluorescent (IF) staining (Fig. S2A). No significant  
234 changes in H3K36me3 were observed by either approach (Figs. 2C-2D; S2A), suggesting  
235 H3K9me3 as the primary target of *KDM4A* in THP1 cells. This finding is in line with our CHIP-

236 seq analysis of H3K36me3 changes in *KDM4A* KD THP1 cells (data not shown) and murine  
237 *kdm4a/b/c* triple KO cells (8). Additionally, there was a marked elevation of H3K27me3 levels  
238 globally in conjunction with the increase of H3K9me3 in *KDM4A* KD THP1 cells (Figs. 2C-2D;  
239 S2A). The global up-regulation of H3K9me3 and H3K27me3 was demonstrated in two further  
240 *KDM4A* KD human MLLr-AML cell lines, MV4:11 and MOLM13 (Fig. S2B).

241 Inhibition of *KDM4A*'s demethylase activity resulted significantly impaired AML cell  
242 proliferation, making it an attractive therapeutic target. In furtherment of this idea, we  
243 investigated whether *KDM4A* is dispensable for normal hematopoiesis. The *Kdm4* family are  
244 required for murine hematopoiesis in C57Bl/6 mice with *kdm4a/b/c* triple KO bone marrow  
245 (BM) cells unable to maintain functional hematopoiesis (8, 22). Normal hematopoiesis  
246 however can tolerate loss of a single *Kdm4* family member as indicated in murine KO  
247 experiments (22). Consistently, our data confirmed no significant loss of colonies in *kdm4a*  
248 KD normal murine BM c-kit<sup>+</sup> cells in methylcellulose assays (Figs. 2E & 2F; S2C).  
249 Methylcellulose assays using human CD34<sup>+</sup> HSPCs from normal healthy donors  
250 demonstrate that reduced levels of *KDM4A* are generally tolerated (Figs. 2G & 2H; S2D) with  
251 less total number of colonies due to a noticeable reduction of CFU-GM in *KDM4A* KD #1  
252 cells.

253 While a *KDM4A* specific inhibitor has not yet been reported, there are a number of *KDM4*  
254 inhibitors in development including IOX1(23) and IOX derivatives (IOX1<sup>dev</sup>, *n*-Octyl ester-8-  
255 hydroxy-5-quinolinecarboxylic acid) (24, 25) as pan-*KDM4* inhibitors. Similar to what was  
256 observed in other cancer cells (23, 24) (26), IOX1 and IOX1<sup>dev</sup> displayed significant inhibition  
257 of cell proliferation in THP1 cells and primary AML patient blasts, inducing differentiation and  
258 apoptosis (Figs. S3A-S3G) with minimum effect on normal human CD34<sup>+</sup> BM HSPCs (Fig.  
259 S3E). Importantly, these phenotypes were accompanied by an increased level of H3K9me3  
260 and H3K27me3 (Fig. S3H), further supporting the anti-leukemic effect was a consequence of  
261 *KDM4A* demethylase inhibition. These results suggest *KDM4A* activity can be readily

262 manipulated to compromise AML cell survival, supporting further investigation of KDM4A as  
263 a potential therapeutic vulnerability in AML.

#### 264 **PAF1 identified as a KDM4A co-regulator is required for human AML cell survival**

265 We next sought to define the molecular mechanism of KDM4A inhibition in killing AML cells.  
266 Profound epigenomic changes observed in *KDM4A* KD AML cells, indicate a significant  
267 transcriptional consequence following KDM4A depletion, causally related to its functional  
268 requirement in AML cell survival. To determine a KDM4A-maintained transcriptional network  
269 essential for AML cells, we compared the global transcriptome of *KDM4A* KD THP1 cells  
270 compared with NTC control cells by RNA-seq. We identified 3375 differentially expressed  
271 (DE) genes that are significantly deregulated following depletion of *KDM4A* compared with  
272 NTC ( $\text{Log}_2$  fold change (FC)  $\geq 0.5$  or  $\leq -0.5$ ; adj.  $p \leq 0.05$ ; Fig. 3A; supplemental file). Of these  
273 DE genes, 67% (2247 out of 3375) were direct targets of KDM4A; ChIP-seq revealed that  
274 KDM4A bound at their TSS (supplemental file). Given the fact that enriched H3K9me3(27)  
275 and H3K27me3(28) marks are often associated with heterochromatin formation leading to  
276 transcriptional repression, we would expect a significant down-regulation of KDM4A direct  
277 targets following its depletion. Indeed, 61% (1315 out of 2274) of putative KDM4A target  
278 genes were down-regulated, while 849 genes (39%) were up-regulated upon *KDM4A* KD in  
279 THP1 cells (Fig. 3A).

280 To provide insights into the survival pathways regulated by KDM4A, we performed gene-set  
281 enrichment analysis (GSEA) on our RNA-seq dataset and revealed a significant enrichment  
282 of genes regulated by polymerase associated factor 1 complex (PAF1c) (29-31)(Fig. 3B).  
283 This is consistent to the down-regulation of *PAF1* following *KDM4A* KD at transcript (Figs. 3C  
284 & 3D) and protein (Fig. S4A) level in human MLLr-AML cell lines, and primary MLLr-AML  
285 patient blasts. PAF1 is a core subunit of PAF1c that is essential for the proliferation of  
286 various subtypes of AML including those driven by MLLr fusions (32, 33) and has been  
287 implicated in a variety of solid tumours as well (34). Indeed, *PAF1* KD phenocopied *KDM4A*

288 KD in MLLr-AML cells, inducing significant apoptosis (Figs. 3E-3G; S4B) and loss of CFU  
289 potential (Fig. 3H). Taken together, these data suggest loss of KDM4A impairs PAF1 function  
290 to maintain leukemic cell survival, supporting PAF1 as an important cofactor of KDM4A in  
291 human AML.

292 **KDM4A-PAF1 maintains appropriate expression of the MLLr-fusion oncogenic**  
293 **program in MLLr-AML**

294 Corroborating the findings above, our ChIP-seq data show a substantial overlap amongst  
295 PAF1c (29), MLL-AF9 (35) and KDM4A binding sites in THP1 cells (Figs. 4A-4C;  
296 supplemental file). Specifically, KDM4A bound the PAF1 promoter region (supplemental file),  
297 suggesting a direct transcriptional regulatory mechanism. Further ChIP-seq analysis show  
298 that there is no significant enrichment of either histone methylation mark at non-KDM4A  
299 binding genomic loci (Figs. 4D & 4E), indicative of a human KDM4A-specific epigenomic  
300 profile. In marked contrast, using H3K9me3/H3K27me3 antibodies show a global gain of  
301 both H3K9me3 and H3K27me3 upon *KDM4A* KD in THP1 cells at KDM4A binding sites  
302 identified in control cells (Figs. 4F & 4G; 5A), including the genomic loci of PAF1 and its  
303 targets (Fig. 5B). These results were further validated by ChIP-QPCR in human MLLr-AML  
304 cell lines (Fig. 5C) and primary patient blasts (Fig. 5D).

305 Furthermore, genes with significant expression changes following KDM4A silencing were  
306 also significantly enriched in direct PAF1 target genes (29)(Figs. 5E; supplemental file),  
307 suggesting a transcriptional network co-regulated by both KDM4A and PAF1. This notion is  
308 supported by the motif analysis of the promoter regions of KDM4A or PAF1 directly regulated  
309 genes (supplemental file), showing that KDM4A bound promoters share almost identical  
310 enrichment of transcription factor (TF) binding motifs as the ones bound by PAF1, including  
311 notably homeobox (HOX) transcription factors, such as TLX2 and DBX (Fig. 5F;  
312 supplemental file; 96%, E-value  $\leq 0.05$ ). Further GSEA analysis on the overlapped DE genes  
313 between *KDM4A* KD and *PAF1* KD revealed a significant downregulation of MLLr fusion

314 target genes (36) as well as HOX family target genes (37) including notably the pro-survival  
315 gene, *BCL2*, and a marked upregulation of a mature hematopoiesis program (38) consistent  
316 to the differentiation phenotype observed upon *KDM4A* KD (Fig. 5G), such as *JUN* and  
317 *GATA2* and pro-apoptotic gene, *BCL2L11* (*BIM*). Although expression of *HOXA9* itself was  
318 not affected by either KD, our data suggest *KDM4A* and *PAF1* co-regulate their downstream  
319 targets in a parallel manner. Collectively, we demonstrate that *KDM4A* collaborating with  
320 *PAF1* plays a critical role in controlling essential gene expression network required for MLLr-  
321 AML cell survival via epigenomic regulation of H3K9me3 and H3K27me3.

322 **A core 9-gene signature downstream of *KDM4A* strongly associated with LSC activity**  
323 **and clinical outcome**

324 Supporting the critical and collaborative role of *KDM4A-PAF1* in AML, *KDM4A* expression is  
325 highly associated with *PAF1* expression in large AML patient datasets representing different  
326 subtypes (Figs. 6A & 6B); *KDM4A-PAF1* expression together can identify patients with  
327 inferior overall survival (Fig. 6C). These evidences suggest that *KDM4A* is required to sustain  
328 the survival and functional potential of AML cells across a broad spectrum of subtypes, rather  
329 than being confined solely to the MLLr molecular subtype. Consistently, *KDM4A* KD induced  
330 significant reduction of cell proliferation were found in additional human AML cell lines  
331 representative of different molecular subtypes (Fig. S5A), coupled with an increase in  
332 apoptosis and loss of CFC potential (Figs. S5B & S5C).

333 These lead to our hypothesise that there is a core gene signature downstream of *KDM4A-*  
334 *PAF1* regulatory axis, which could be extracted, specifically associated with patient outcome,  
335 and can be used as a prognosis marker for AML comparable with the known LSC score,  
336 *LSC17* (39). For this, we adopted a least absolute shrinkage and selection operator (LASSO)  
337 linear regression analysis (39-41) on genes within *KDM4A* regulated GEPs (*KDM4A* KD  
338  $\text{Log}_2\text{FC} \geq 1$  or  $\leq -1$ ; adj.  $p \leq 0.05$ ; supplemental file) discerning which genes best related to  
339 patient overall survival in a training subset first, and then performed regularisation in order to

340 make the model robust to overfitting. Using this approach, a *KDM4A*-associated gene  
341 expression signature (GES) was constructed and calculated as the sum of the weighted  
342 expression of each of the identified 9 genes, termed *KDM4A-9* (Fig. 6D). Strikingly, high  
343 *KDM4A-9* scores were highly associated with poor overall survival (OS) in a number of large  
344 independent AML cohorts (Figs. 6E-6H) independent of age, cytogenetic risk score and  
345 frequent mutation status of known prognostic value. The robust prognostic value of the  
346 *KDM4A-9* score across diverse AML genotypes indicates, that the score may be related to  
347 the important biological activities of AML-LSCs. We find that the *KDM4A-9* score correlates  
348 with the LSC-based biomarker, *LSC17* score of AML samples and over 75% of *KDM4A-9*  
349 high score (above medium value) fractions are LSC+ (Fig. 7A) ; akin to the *LSC17*, *KDM4A-9*  
350 is a strong predictive indicator of AML LSC activity (Fig. 7B). Interestingly, there is no  
351 overlap between these two gene signatures, prompting us to test whether a combined  
352 signature termed *KDM4A-9/LSC17*, which is calculated as the linear sum of the two LSC-  
353 related scaled (Min-max scaling) scores could further improve prediction of stemness in AML  
354 samples by ROC curve analysis. Individually, we find that the *KDM4A-9* is capable of higher  
355 sensitivity (*KDM4A-9*: 85.5% vs. *LSC17*: 68.1%) whilst the *LSC17* has better specificity  
356 (*LSC17*: 73% vs. *KDM4A-9*: 51.7%). Together, the combined score achieves an optimal  
357 balance between specificity and sensitivity (specificity: 67.4%, sensitivity: 76.8%) (Fig. 7C)  
358 overcoming the limitations of either the *LSC17* or the *KDM4A-9* alone. These data  
359 demonstrate that the *KDM4A-9/LSC17* combined signature score are superior LSC  
360 biomarkers, reliably predicting LSC activity in AML cells. Indeed, we observe an  
361 improvement of the combined score over the *LSC17* score's ability to predict survival in the  
362 Beat AML dataset (Figs. 7D & 7E).

363 *KDM4A* binds at the promoter regions of *KDM4A-9* genes, where there is enrichment of  
364 H3K9me3 and H3K27me3 signal upon *KDM4A* KD (Fig. 8A; supplemental file), suggesting a  
365 direct regulation of their expressions. We further validated these genes as *KDM4A-PAF1*  
366 axis downstream transcriptional targets by QPCR in a number of human AML cell lines and

367 primary AML blasts following *KDM4A* KD or *PAF1* KD (Fig. 8B). Additionally, in patient AML  
368 cohorts we observed that the majority of *KDM4A-9* genes show statistically significant  
369 correlation with *KDM4A* & *PAF1* expressions (Figs. 8C & 8D). Furthermore, we performed  
370 weighted gene correlation network analysis (WCGNA) (42) using gene expression data from  
371 262 diagnostic AML samples from the Beat AML dataset to evaluate the pairwise relationship  
372 between *KDM4A*, *PAF1* and the *KDM4A-9* and *LSC17* gene signatures across AML. Here,  
373 we observed that these genes have high topological overlap (topological overlap matrix  
374 (TOM)  $\geq 0.05$ ) and that *KDM4A* represents a highly connected node within this gene  
375 network. These data demonstrate that *KDM4A-PAF1* regulates the *KDM4A-9/LSC17* network  
376 which is persistent across AML subtypes (Fig. 8E).

#### 377 ***KDM4A* has a distinct function to another *KDM4* family member, *KDM4C* in AML**

378 Previously, Cheung *et al.* showed that another *KDM4* family member, *KDM4C* is required for  
379 MLLr-AML cell survival (7), indicating an overlapping role of *KDM4A* and *KDM4C* in AML.  
380 However, forced-expression of wild-type human *KDM4C* failed to rescue the clonogenic  
381 activity of murine MLL-AF9 AML cells transduced with *kdm4a* KD virus (Figs. S6A & S6B),  
382 suggesting there is a role for *KDM4A*, that is distinct from that of *KDM4C*. This is also in line  
383 with the previously reported data showing no increase of global H3K27me3 level upon  
384 pharmacological inhibition of *KDM4C* in MLLr-AML cells (7).

385 Consistently, at the molecular level, *KDM4A* KD led to global transcriptional changes distinct  
386 from that of *KDM4C* KD via GSEA comparison (Fig. S6C), further supporting a unique role  
387 for *KDM4A* compared to *KDM4C* in human AML. In particular, *KDM4A* KD has no significant  
388 impact on gene expression of two established targets of *KDM4C*, *HOXA9* and *MEIS1* in  
389 human MLLr-AML cells. These results are also validated by Q-PCR using shRNAs targeting  
390 *HOXA9* as control (Fig. S6D). More importantly, *kdm4c* KD had no impact on *PAF1*  
391 expression, nor its associated GEP targeted by *KDM4A* including *KDM4A-9* and *LSC17* gene  
392 signatures (Fig. S6E). Together, these data demonstrate a unique and critical role of *KDM4A*



393 in AML. supporting a KDM4A-mediated epigenomic network required for AML cell self-  
394 renewal and survival.

395

## 396 **Discussion**

397 MLLr leukemia is responsible for nearly 10% of all acute leukemia with adverse prognosis;  
398 patients often develop resistance to standard chemotherapy and relapse (43). A general  
399 MLLr mechanism in AML leukemogenesis involves MLL fusion proteins associating with a  
400 number of complexes including PAF1c and DOT1Lc, leading to aberrant transcription of  
401 MLLr target genes (43, 44). Therapeutically target DOT1L has shown promising activity in  
402 preclinical studies. However, lack of tractable enzymatic activities limits the potential of PAF1  
403 or other subunits of the PAFc as therapeutic targets. In this study, we identify a novel  
404 signalling axis of *KDM4A-PAF1* co-regulating essential oncogenic transcriptional networks is  
405 prevalent in human AML. Thus, inhibition of the histone demethylase activity of KDM4A may  
406 provide a novel alternative mean to effectively eliminate leukemic cells with broader  
407 therapeutic applications in human AML.

408 Previous reports indicate that the KDM4 family as a whole are required for normal  
409 hematopoiesis (8, 22) and during embryonic development (45). However, loss of individual  
410 members is well tolerated in normal cells (22). For example, *Kdm4a* is not required for  
411 embryonic stem cell function (45) and loss of a single Kdm4 family member does not grossly  
412 affect hematopoiesis (22). These data highlight the importance of identifying KDM4 family  
413 members that are selectively required for the survival of AML cells since broad inhibition of  
414 KDM4 family is associated with toxicity. Our data demonstrate KDM4A has a distinct function  
415 to another KDM4 family member, KDM4C in AML; it is selectively required for AML cell  
416 survival, with no immediate negative effect on normal hematopoiesis *in vitro*, suggesting  
417 leukemic cells are more sensitive to KDM4A depletion therefore offering a potential  
418 therapeutic window. Given the evidence that other members of the human KDM4 family are  
419 required for normal tissue development (46), our study provides a strong rationale for further



420 development of KDM4A specific inhibitors, which are expected to have anti-leukemic  
421 properties below clinically achievable doses therefore with minimal cytotoxicity towards  
422 healthy tissues, presenting a promising strategy for novel epigenetic-based therapy in AML.

423 Our data support a model that KDM4A and the PAF1c cooperate to enforce an oncogenic  
424 transcriptional programme in AML cells. This is supported by recent data (6, 47) which  
425 demonstrate that PAF1c mediated recruitment of the H3K9me3 methyltransferase SETDB1  
426 antagonizes MLL/PAF1c signalling in MLLr-AML cells and inhibition of SETB1 promotes AML  
427 cell proliferation. Consistently, our data suggest that the precise global distribution of  
428 H3K9me3 play a critical role in AML. H3K9me3 has emerged as a key player in repressing  
429 lineage-inappropriate genes, thereby impeding the reprogramming of cell identity during  
430 development and cell fate determination (27, 48). It would be interesting to determine further  
431 the clinical diagnostic/prognostic relevance of H3K9me3 in relation to KDM4A and its  
432 downstream GES in AML patients.

433 *KDM4A-9* shows strong therapeutic implications comparable as *LSC17* (39). A high *KDM4A-*  
434 *9* score distils the downstream consequences of high levels of *KDM4A-PAF1* expression in  
435 AML, probably reflecting the important biological property of KDM4A in myeloid  
436 leukemogenesis. The detailed functional relevance of the majority of *KDM4A-9* genes in  
437 leukemogenesis is largely unknown; except Tetraspanin (CD82) (49, 50) which has been  
438 suggested to play an important regulatory role in AML. Thus, further validation is needed to  
439 determine the individual function of *KDM4A-9* genes in myeloid leukemia. The association  
440 between KDM4A or its targeted transcriptional networks, such as *KDM4A-9* and known high-  
441 risk clinical features should be explored further. Given the chemotherapy-resistant phenotype  
442 of high *KDM4A-9* score patients, these patients may better benefit more from novel  
443 molecularly targeted therapies (e.g. KDM4A-based therapy) whilst sparing low risk patients  
444 from the additional treatment related toxicity associated with intensified regimens.

445

## 446 **Acknowledgments**

447 We thank Jennifer Cassels and Karen Dunn in Paul O’Gorman Leukaemia Research Centre,  
448 Glasgow, Gary Spencer, Jeff Barry, Abi Johnson and staff from the Biological Resources  
449 Unit in CRUK Manchester Institute, for technical assistance. We thank Dr. Tim Somervaille  
450 for feedbacks and critical comments on the manuscript. We thank Dr. Peter J. M. Valk  
451 (Department of Hematology, Erasmus University Medical Centre, Rotterdam) for kindly  
452 providing the survival data for the GSE6891 data set and Dr Tobias Herold and the AMLCG  
453 group for granting access to the clinical data for GSE37642.

454

## 455 **Authorship and conflict of interest statement**

456 XH, MM designed the study. MEM, LM, SP, NM, RPB and AH performed the experiments.  
457 MM and XH analysed genomic data and performed the statistical analysis. XH and MM wrote  
458 the manuscript. SM, RMJL, HGJ, DV, AMM and XH provided critical support and supervised  
459 the study. All authors read and approved the manuscript. The authors have declared that no  
460 conflict of interest exists.

461

462

## **References**

463

- 464 1. Lund K, Cole JJ, VanderKraats ND, McBryan T, Pchelintsev NA, Clark W, et al.  
465 DNMT inhibitors reverse a specific signature of aberrant promoter DNA methylation and  
466 associated gene silencing in AML. *Genome Biol.* 2014;15(8):406.
- 467 2. Deshpande AJ, Deshpande A, Sinha AU, Chen L, Chang J, Cihan A, et al. AF10  
468 regulates progressive H3K79 methylation and HOX gene expression in diverse AML  
469 subtypes. *Cancer cell.* 2014;26(6):896-908.
- 470 3. Wong SH, Goode DL, Iwasaki M, Wei MC, Kuo HP, Zhu L, et al. The H3K4-Methyl  
471 Epigenome Regulates Leukemia Stem Cell Oncogenic Potential. *Cancer cell.*  
472 2015;28(2):198-209.
- 473 4. Muller-Tidow C, Klein HU, Hascher A, Isken F, Tickenbrock L, Thoennissen N, et al.  
474 Profiling of histone H3 lysine 9 trimethylation levels predicts transcription factor activity and  
475 survival in acute myeloid leukemia. *Blood.* 2010;116(18):3564-71.
- 476 5. Grovdal M, Karimi M, Khan R, Aggerholm A, Antunovic P, Astermark J, et al.  
477 Maintenance treatment with azacytidine for patients with high-risk myelodysplastic  
478 syndromes (MDS) or acute myeloid leukaemia following MDS in complete remission after  
479 induction chemotherapy. *Br J Haematol.* 2010;150(3):293-302.

- 480 6. Ropa J, Saha N, Hu H, Peterson LF, Talpaz M, Muntean AG. SETDB1 mediated  
481 histone H3 lysine 9 methylation suppresses MLL-fusion target expression and leukemic  
482 transformation. *Haematologica*. 2019.
- 483 7. Cheung N, Fung TK, Zeisig BB, Holmes K, Rane JK, Mowen KA, et al. Targeting  
484 Aberrant Epigenetic Networks Mediated by PRMT1 and KDM4C in Acute Myeloid Leukemia.  
485 *Cancer cell*. 2016;29(1):32-48.
- 486 8. Agger K, Miyagi S, Pedersen MT, Kooistra SM, Johansen JV, Helin K. Jmjd2/Kdm4  
487 demethylases are required for expression of Il3ra and survival of acute myeloid leukemia  
488 cells. *Genes Dev*. 2016;30(11):1278-88.
- 489 9. Huang X, Spencer GJ, Lynch JT, Ciceri F, Somerville TD, Somervaille TC. Enhancers  
490 of Polycomb EPC1 and EPC2 sustain the oncogenic potential of MLL leukemia stem cells.  
491 *Leukemia*. 2014;28(5):1081-91.
- 492 10. Berry WL, Shin S, Lightfoot SA, Janknecht R. Oncogenic features of the JMJD2A  
493 histone demethylase in breast cancer. *Int J Oncol*. 2012;41(5):1701-6.
- 494 11. Black JC, Manning AL, Van Rechem C, Kim J, Ladd B, Cho J, et al. KDM4A lysine  
495 demethylase induces site-specific copy gain and rereplication of regions amplified in tumors.  
496 *Cell*. 2013;154(3):541-55.
- 497 12. Harris WJ, Huang X, Lynch JT, Spencer GJ, Hitchin JR, Li Y, et al. The histone  
498 demethylase KDM1A sustains the oncogenic potential of MLL-AF9 leukemia stem cells.  
499 *Cancer cell*. 2012;21(4):473-87.
- 500 13. Somervaille TC, Cleary ML. Identification and characterization of leukemia stem cells  
501 in murine MLL-AF9 acute myeloid leukemia. *Cancer cell*. 2006;10(4):257-68.
- 502 14. Wouters BJ, Lowenberg B, Erpelinck-Verschueren CA, van Putten WL, Valk PJ,  
503 Delwel R. Double CEBPA mutations, but not single CEBPA mutations, define a subgroup of  
504 acute myeloid leukemia with a distinctive gene expression profile that is uniquely associated  
505 with a favorable outcome. *Blood*. 2009;113(13):3088-91.
- 506 15. Metzeler KH, Hummel M, Bloomfield CD, Spiekermann K, Braess J, Sauerland MC,  
507 et al. An 86-probe-set gene-expression signature predicts survival in cytogenetically normal  
508 acute myeloid leukemia. *Blood*. 2008;112(10):4193-201.
- 509 16. Li Z, Herold T, He C, Valk PJ, Chen P, Jurinovic V, et al. Identification of a 24-gene  
510 prognostic signature that improves the European LeukemiaNet risk classification of acute  
511 myeloid leukemia: an international collaborative study. *J Clin Oncol*. 2013;31(9):1172-81.
- 512 17. Tyner JW, Tognon CE, Bottomly D, Wilmot B, Kurtz SE, Savage SL, et al. Functional  
513 genomic landscape of acute myeloid leukaemia. *Nature*. 2018;562(7728):526-31.
- 514 18. Tate JG, Bamford S, Jubb HC, Sondka Z, Beare DM, Bindal N, et al. COSMIC: the  
515 Catalogue Of Somatic Mutations In Cancer. *Nucleic Acids Res*. 2019;47(D1):D941-D7.
- 516 19. Lynch JT, Cockerill MJ, Hitchin JR, Wiseman DH, Somervaille TC. CD86 expression  
517 as a surrogate cellular biomarker for pharmacological inhibition of the histone demethylase  
518 lysine-specific demethylase 1. *Anal Biochem*. 2013;442(1):104-6.
- 519 20. Chung YG, Matoba S, Liu Y, Eum JH, Lu F, Jiang W, et al. Histone Demethylase  
520 Expression Enhances Human Somatic Cell Nuclear Transfer Efficiency and Promotes  
521 Derivation of Pluripotent Stem Cells. *Cell Stem Cell*. 2015;17(6):758-66.

- 522 21. Whetstine JR, Nottke A, Lan F, Huarte M, Smolikov S, Chen Z, et al. Reversal of  
523 histone lysine trimethylation by the JMJD2 family of histone demethylases. *Cell*.  
524 2006;125(3):467-81.
- 525 22. Agger K, Nishimura K, Miyagi S, Messling JE, Rasmussen KD, Helin K. The  
526 KDM4/JMJD2 histone demethylases are required for hematopoietic stem cell maintenance.  
527 *Blood*. 2019;134(14):1154-8.
- 528 23. King ON, Li XS, Sakurai M, Kawamura A, Rose NR, Ng SS, et al. Quantitative high-  
529 throughput screening identifies 8-hydroxyquinolines as cell-active histone demethylase  
530 inhibitors. *PLoS One*. 2010;5(11):e15535.
- 531 24. Schiller R, Scozzafava G, Tumber A, Wickens JR, Bush JT, Rai G, et al. A cell-  
532 permeable ester derivative of the JmjC histone demethylase inhibitor IOX1. *ChemMedChem*.  
533 2014;9(3):566-71.
- 534 25. Bavetsias V, Lanigan RM, Ruda GF, Atrash B, McLaughlin MG, Tumber A, et al. 8-  
535 Substituted Pyrido[3,4-d]pyrimidin-4(3H)-one Derivatives As Potent, Cell Permeable, KDM4  
536 (JMJD2) and KDM5 (JARID1) Histone Lysine Demethylase Inhibitors. *J Med Chem*.  
537 2016;59(4):1388-409.
- 538 26. Duan L, Rai G, Roggero C, Zhang QJ, Wei Q, Ma SH, et al. KDM4/JMJD2 Histone  
539 Demethylase Inhibitors Block Prostate Tumor Growth by Suppressing the Expression of AR  
540 and BMYB-Regulated Genes. *Chem Biol*. 2015;22(9):1185-96.
- 541 27. Becker JS, Nicetto D, Zaret KS. H3K9me3-Dependent Heterochromatin: Barrier to  
542 Cell Fate Changes. *Trends Genet*. 2016;32(1):29-41.
- 543 28. Morey L, Helin K. Polycomb group protein-mediated repression of transcription.  
544 *Trends Biochem Sci*. 2010;35(6):323-32.
- 545 29. Yu M, Yang W, Ni T, Tang Z, Nakadai T, Zhu J, et al. RNA polymerase II-associated  
546 factor 1 regulates the release and phosphorylation of paused RNA polymerase II. *Science*.  
547 2015;350(6266):1383-6.
- 548 30. Kim J, Guermah M, Roeder RG. The human PAF1 complex acts in chromatin  
549 transcription elongation both independently and cooperatively with SII/TFIIS. *Cell*.  
550 2010;140(4):491-503.
- 551 31. Chen FX, Woodfin AR, Gardini A, Rickels RA, Marshall SA, Smith ER, et al. PAF1, a  
552 Molecular Regulator of Promoter-Proximal Pausing by RNA Polymerase II. *Cell*.  
553 2015;162(5):1003-15.
- 554 32. Serio J, Ropa J, Chen W, Mysliwski M, Saha N, Chen L, et al. The PAF complex  
555 regulation of Prmt5 facilitates the progression and maintenance of MLL fusion leukemia.  
556 *Oncogene*. 2018;37(4):450-60.
- 557 33. Muntean AG, Tan J, Sitwala K, Huang Y, Bronstein J, Connelly JA, et al. The PAF  
558 complex synergizes with MLL fusion proteins at HOX loci to promote leukemogenesis.  
559 *Cancer cell*. 2010;17(6):609-21.
- 560 34. Chaudhary K, Deb S, Moniaux N, Ponnusamy MP, Batra SK. Human RNA  
561 polymerase II-associated factor complex: dysregulation in cancer. *Oncogene*.  
562 2007;26(54):7499-507.

- 563 35. Prange KHM, Mandoli A, Kuznetsova T, Wang SY, Sotoca AM, Marneth AE, et al.  
564 MLL-AF9 and MLL-AF4 oncofusion proteins bind a distinct enhancer repertoire and target  
565 the RUNX1 program in 11q23 acute myeloid leukemia. *Oncogene*. 2017;36(23):3346-56.
- 566 36. Zuber J, Shi J, Wang E, Rappaport AR, Herrmann H, Sison EA, et al. RNAi screen  
567 identifies Brd4 as a therapeutic target in acute myeloid leukaemia. *Nature*.  
568 2011;478(7370):524-8.
- 569 37. Faber J, Krivtsov AV, Stubbs MC, Wright R, Davis TN, van den Heuvel-Eibrink M, et  
570 al. HOXA9 is required for survival in human MLL-rearranged acute leukemias. *Blood*.  
571 2009;113(11):2375-85.
- 572 38. Ivanova NB, Dimos JT, Schaniel C, Hackney JA, Moore KA, Lemischka IR. A stem  
573 cell molecular signature. *Science*. 2002;298(5593):601-4.
- 574 39. Ng SW, Mitchell A, Kennedy JA, Chen WC, McLeod J, Ibrahimova N, et al. A 17-gene  
575 stemness score for rapid determination of risk in acute leukaemia. *Nature*.  
576 2016;540(7633):433-7.
- 577 40. Friedman J, Hastie T, Tibshirani R. Regularization Paths for Generalized Linear  
578 Models via Coordinate Descent. *J Stat Softw*. 2010;33(1):1-22.
- 579 41. Simon N, Friedman J, Hastie T, Tibshirani R. Regularization Paths for Cox's  
580 Proportional Hazards Model via Coordinate Descent. *J Stat Softw*. 2011;39(5):1-13.
- 581 42. Langfelder P, Horvath S. WGCNA: an R package for weighted correlation network  
582 analysis. *BMC Bioinformatics*. 2008;9:559.
- 583 43. Marschalek R. Mechanisms of leukemogenesis by MLL fusion proteins. *Br J*  
584 *Haematol*. 2011;152(2):141-54.
- 585 44. Ballabio E, Milne TA. Molecular and Epigenetic Mechanisms of MLL in Human  
586 Leukemogenesis. *Cancers (Basel)*. 2012;4(3):904-44.
- 587 45. Pedersen MT, Kooistra SM, Radzishchanskaya A, Laugesen A, Johansen JV, Hayward  
588 DG, et al. Continual removal of H3K9 promoter methylation by Jmjd2 demethylases is vital  
589 for ESC self-renewal and early development. *EMBO J*. 2016;35(14):1550-64.
- 590 46. Iwamori N, Zhao M, Meistrich ML, Matzuk MM. The testis-enriched histone  
591 demethylase, KDM4D, regulates methylation of histone H3 lysine 9 during spermatogenesis  
592 in the mouse but is dispensable for fertility. *Biol Reprod*. 2011;84(6):1225-34.
- 593 47. Ropa J, Saha N, Chen Z, Serio J, Chen W, Mellacheruvu D, et al. PAF1 complex  
594 interactions with SETDB1 mediate promoter H3K9 methylation and transcriptional repression  
595 of Hoxa9 and Meis1 in acute myeloid leukemia. *Oncotarget*. 2018;9(31):22123-36.
- 596 48. Monaghan L, Massett ME, Bunschoten RP, Hoose A, Pirvan P-A, Liskamp RMJ, et  
597 al. The emerging role of H3K9me3 as a potential therapeutic target in acute myeloid  
598 leukaemia. *Front Oncol*. 2019;9:705.
- 599 49. Marjon KD, Termini CM, Karlen KL, Saito-Reis C, Soria CE, Lidke KA, et al.  
600 Tetraspanin CD82 regulates bone marrow homing of acute myeloid leukemia by modulating  
601 the molecular organization of N-cadherin. *Oncogene*. 2016;35(31):4132-40.

602 50. Nishioka C, Ikezoe T, Takeuchi A, Nobumoto A, Tsuda M, Yokoyama A. The novel  
603 function of CD82 and its impact on BCL2L12 via AKT/STAT5 signal pathway in acute  
604 myelogenous leukemia cells. *Leukemia*. 2015;29(12):2296-306.

605

606

## Figure Legends

**Figure 1. KDM4A is required for the functional potential of human and murine AML cells.** (A-E) Human THP1 AML cells were transduced with lentiviruses targeting *KDM4A* or other KDM4 family members for KD (#1 & #2 represent individual distinct lentiviruses targeting genes for KD as indicated), or a non-targeting control (NTC). All bar charts show mean  $\pm$  s.e.m.. (A) Resorufin signal after 4 days of individual KDM4 family member KD relative to NTC control cells (n=3); \* $p$ <0.01 for comparison of each KD versus NTC. (B) Expression of *KDM4A/B/C/D* in indicated KD cells relative to NTC control cells (n=3); \* $p$ <0.001. (C) Representative immunoblot showing *KDM4A* KD in THP1 cells (n = 3). (D) Scatter plot shows correlation of *KDM4A* KD with inhibition of frequency of colony forming cells (CFC) enumerated following 10 days in semisolid culture (n=3), as determined by QPCR; \* $p$ <0.001. (E) Percentage of apoptotic cells determined by Annexin V<sup>+</sup>/ 7AAD<sup>+</sup> staining on day 4 of liquid culture after puromycin selection (n = 3); \* $p$ < 0.001. (F-G) The indicated primary unfractionated patient blasts were transduced with lentiviruses targeting *KDM4A* for KD, or an NTC. Primary AML cells used include BB160, containing t(9;11) (MLL-AF9) chromosomal translocation and BB86 (normal cytogenetics, non-MLL) (BB number is the Manchester Cancer Research Centre Biobank sample identifier). All bar charts show mean  $\pm$  s.e.m. (F) CFC frequencies of primary human AML blasts (n=3) following lentivirus infection, puromycin selection and initiation of *KDM4A* KD; \* $p$ <0.0001. (G) Representative images from (F). (H) CFC frequencies of primary murine MLL-AF9 AML cells following *KDM4A* depletion (n=3); \* $p$ <0.0001. (I) Survival curves of NSG mice transplanted with 10,000 *KDM4A* KD or NTC THP1 cells (n=5 per cohort);  $p$  by log-rank test. (J) Survival curves of NSG mice transplanted with 10<sup>6</sup> *KDM4A* KD or NTC primary AML cells (BB160, n=7 per cohort);  $p$  by log-rank test. (K) Spleen weights of mice from (J) with a representative image of the spleen.  $p$  by one-way ANOVA, F=34.13045.



## Figure 2. Targeting KDM4A's demethylase activity inhibits AML cell proliferation.

(A) CFC frequencies for control and *kdm4a* KD cells from the indicated murine MLL-AF9 cells overexpressing empty vector (MTV) or wild type human HA tagged-KDM4A or an enzymatically inactive mutant of human HA tagged-KDM4A (KDM4Amut H188A/E190A) (n=3); \* $p < 0.001$ , <sup>NS</sup> $p > 0.05$ . Representative immunoblot below bar plot shows the over-expression of wild type (wt) and mutant (mut) human HA-tagged KDM4A in correlated MLL-AF9 cells labeled, detected by HA antibody. (B) Bar chart showing mean  $\pm$  s.e.m. expression of *kdm4a* by QPCR in *kdm4a* KD cells from (A) relative to NTC in murine MLL-AF9 leukemic cells (n=3); \* $p < 0.01$ . (C) Representative immunoblots with indicated antibodies showing expression of indicated proteins in THP1 cells 72 hours following initiation of *KDM4A* KD (n=3). (D) Immunoblot quantification of signal intensity relative to H3 total from (C). (E-H) The indicated primary human and murine AML cells were transduced with lentiviruses targeting *KDM4A* or *kdm4a* for KD, or an NTC. All bar charts show mean  $\pm$  s.e.m. CFC frequencies of (E) primary normal murine c-kit<sup>+</sup> BM cells for NTC and *kdm4a* KD (n=3) or (G) primary normal human CD34<sup>+</sup> HSPC cells for NTC and *KDM4A* KD cells (n=3); \* $p < 0.01$ . (F) and (H) are representative images from (E) and (G), Scale bar represents 100  $\mu$ m and 200 $\mu$ m, respectively.

## Figure 3. PAF1 identified as a cofactor of KDM4A in MLLr-AML.

(A) Volcano plot showing global changes in gene expression following loss of *KDM4A* compared to NTC control THP1 cells as identified by RNAseq. The absolute number of upregulated or downregulated genes which are bound by KDM4A are indicated at the top right and left side of the plot, respectively (KDM4A bound: FDR  $\leq 0.01$ , gene expression:  $\log_2$  FC  $\geq 0.5$  or  $\leq -0.5$ ; adjusted (adj.  $p$ )  $p \leq 0.05$ ). (B) GSEA show overlapping transcriptional consequences following loss of *KDM4A* or *PAF1* in THP1 cells. Specifically, genes repressed (left panel) or activated (right panel) are upregulated and downregulated



respectively, following loss of KDM4A (29). (C-H) THP1 cells and other indicated human AML cells were transduced with lentiviruses targeting *KDM4A* or *PAF1* for KD, or an NTC. All bar charts show mean  $\pm$  s.e.m. (C) Bar chart showing relative expression of *KDM4A* and *PAF1* by QPCR in comparison with NTC control cells following *KDM4A* KD using two different shRNA constructs #1 & #2 in THP1 cells (n=3) (D) and the other indicated human AML cells and primary AML cells include PX21, containing t(6;11)(MLL-AF6) chromosomal translocation and PX30 t(10;11)(MLL-AF10) (PX number is the Paul O’Gorman Leukaemia Research Centre Biobank sample identifier) (n=3) (F); \* $p < 0.01$ . (E-F) Percentage of live cell counts in comparison with NTC control (E) in THP1 cells 4 days following lentiviral infection (n=3) and (F) in the indicated human MLLr-AML cell lines and AML primary cells following *KDM4A* KD in comparison with NTC control cells (n=3) (I) \* $p < 0.01$ . (G) Bar chart showing relative expression of *PAF1* by QPCR in comparison with NTC control cells following *PAF1* KD using two different shRNA constructs #1 & #2 in (E & F). (H) Bar chart showing the loss of CFC frequencies of indicated human AML cell lines and primary patient samples (n=3) following lentivirus infection, puromycin selection and initiation of *PAF1* KD; \* $p < 0.001$ .

**Figure 4. KDM4A-PAF1 co-regulates essential MLLr-fusion oncogenic transcriptional program.**

(A) Feature distribution of KDM4A ChIP-seq peaks in the THP1 cell genome. (B) Metagene plots showing a distinct peak in KDM4A normalised ChIP-seq signal in reads per million mapped reads (RPM) at transcription starting sites (TSS) in WT THP1 cells. (C) Venn diagram showing the overlap between binding sites of KDM4A, PAF1c (29) and MLL-AF9 (35) in THP1 cells as determined by ChIP-seq;  $p$  by hypergeometric test. (D-G) Metagene plots showing an enrichment of H3K9me3 (F) and H3K27me3 (G) at KDM4A bound TSS compared to unbound TSS (D & E) following *KDM4A* KD by ChIP-seq.

**Figure 5. KDM4A-PAF1 maintains appropriate expression of the MLLr-fusion oncogenic program in MLLr-AML.**

(A) Heatmap showing normalised ChIP-seq signal of H3K9me3 and H3K27me3 at TSS across all genes in *KDM4A* KD and NTC THP1 cells ordered by *KDM4A* enrichment. (B) Genomic snapshot demonstrates *KDM4A* occupancy at the PAF1 promoter region and enrichment of H3K9me3 and H3K27me3 signal throughout the PAF1 gene body and promoter upon *KDM4A* KD in comparison with NTC control in THP1 cells. Blue bars show the two individual probes used for ChIP-QPCR in (C & D). (C-D) H3K9me3 and H3K27me3 ChIP signal/input (fold change of NTC) in the indicated human MLLr-AML cell lines (C) and indicated primary AML samples including PX21 (MLL-AF6) and PX30 (MLL-FA10) (D) as determined by ChIP-QPCR following depletion of *KDM4A*; \* $p < 0.001$ . (E) Venn diagrams showing the overlap between directly bound downregulated and upregulated targets of *KDM4A* and the PAF1c (24) in THP1 cells following knockdown of *KDM4A* and *PAF1* as determined by ChIPseq;  $p$  by hypergeometric test. (F) Motif significance and *KDM4A*  $\log_2$  enrichment at *KDM4A* or PAF1 regulated promoters (FDR  $\leq 0.01$ , DE  $\leq -0.5$  or DE  $\geq 0.5$ ). Color represents motif significance within *KDM4A* and PAF1 regulated promoters. Size denotes the average  $\log_2$  enrichment of *KDM4A* within each group of promoters that possess the respective transcription factor (TF) binding motif. Top five motifs detected in *KDM4A* or PAF1 regulated promoters sorted by statistical significance (E-value). (G) GSEA results showing significant overlap of *KDM4A* KD transcriptional consequences with down-regulation of MLL-AF9 and HOXA9 targets and up-regulation of a mature hematopoiesis program in THP1 cells, \* $q < 5\%$ .

**Figure 6. A core 9-gene signature downstream of *KDM4A* strongly associated with clinical outcome.**

(A-B) Scatterplot showing the correlation between expression of *KDM4A* versus *PAF1* in primary AML patient samples (GSE37642) (A) and (Beat AML/Vizome), R by Pearson correlation,  $p < 0.05$ . (B). (C) Kaplan-Meier survival analysis conducted in Beat AML dataset. Patients with both *KDM4A*<sup>high</sup> and *PAF1*<sup>high</sup> expression have inferior overall survival. Patients dichotomized into high and low groups for *KDM4A* or *PAF1* based on whether expression was above the median for each gene;  $p$  by log-rank test. (D) Heatmap showing gene expression of the *KDM4A-9* gene signature genes with the table of their respective regression coefficients and log<sub>2</sub> FC as determined by RNA-seq in *KDM4A* KD THP1 cells. (E-H) Kaplan-Meier survival analysis conducted in the large AML datasets (GSE37642) (E), (Beat AML/Vizome) (F), (GSE6891) (G) and (GSE12417) (H) showing that the *KDM4A-9* score can predict survival across AML patients of varying subtypes. Patients were dichotomized into high and low groups based on whether they possessed a score above or below the median signature score;  $p$  by log-rank test.

**Figure 7. *KDM4A-9* enriched with LSC activity, is a poor prognosis marker for AML.**

(A) Scatterplot showing moderate correlation between the *KDM4A-9* score and *LSC17* score in primary AML patient samples (GSE76008). LSC enriched (LSC+, n=138) cell fractions from 78 patient samples are coloured blue whilst those that lack LSC enrichment (LSC-, n=89) are coloured red. Over 75% of *KDM4A-9* high score (above median value) fractions are LSC+. Pearson correlation used to assess correlation. Significance determined by t-test. (B) Box plot showing *KDM4A-9* or *LSC17* signature scores in two comparative groups: LSC+ and LSC- from (A); unpaired *t*-test, \* $p < 0.0001$ . (C) ROC curves of *KDM4A-9* (blue), *LSC17* (yellow) and *KDM4A-9/LSC17* (green) show the diagnostic capability of each signature to predict LSC enrichment in AML samples. The black bars in each plot are the 95% confidence intervals for the optimal cut-off. The Youden index was used to determine the optimal cut-off for each signature. (D-E) Patients in the Beat AML/Vizome dataset were

dichotomized into high and low groups based on whether they possessed a score above or below the median signature score. Kaplan-Meier survival analysis conducted showing that the combined *KDM4A-9/LSC17* score (E) is effective in prediction of AML patient survival over *LSC17* score alone (D).

**Figure 8. KDM4A-mediated epigenomic network required for AML cell self-renewal and survival.**

(A) Heatmap showing relative expression of *KDM4A-9* signature genes as determined by QPCR in the indicated human MLLr-AML cell lines and AML primary cells following *KDM4A* KD or *PAF1* KD in comparison with NTC control cells (n=3). (B) Input normalised ChIP-seq coverage tracks showing *KDM4A* ChIP signal in WT THP1 cells and H3K9me3/H3K27me3 ChIP signal normalized to NTC in *KDM4A* KD THP1 cells at *KDM4A-9* signature genomic loci (+/-1kb TSS). Normalised signal shown is the log<sub>2</sub> ratio of read counts compared against input control. (C-D) Correlation matrices showing the Pearson correlation coefficients for *KDM4A*, *KDM4A-9* genes and *PAF1* gene expression in GSE37642 (C) and Beat AML/Vizome (D) AML datasets. Significance determined by t-test; \* $p < 0.05$ , \*\* $p < 0.01$ , \*\*\* $p < 0.001$ , \*\*\*\* $p < 0.0001$ . (E) *KDM4A*, *PAF1*, *KDM4A-9* (in blue) and *LSC17* (in green) gene network showing the topological overlap between genes as detected from 262 AML samples (Beat AML) (the corresponding topological overlap matrix (TOM)  $\geq 0.05$  between nodes).

# Figure 1

bioRxiv preprint doi: <https://doi.org/10.1101/2020.10.30.361881>; this version posted October 30, 2020. The copyright holder for this preprint (which was not certified by peer review) is the author/funder. All rights reserved. No reuse allowed without permission.

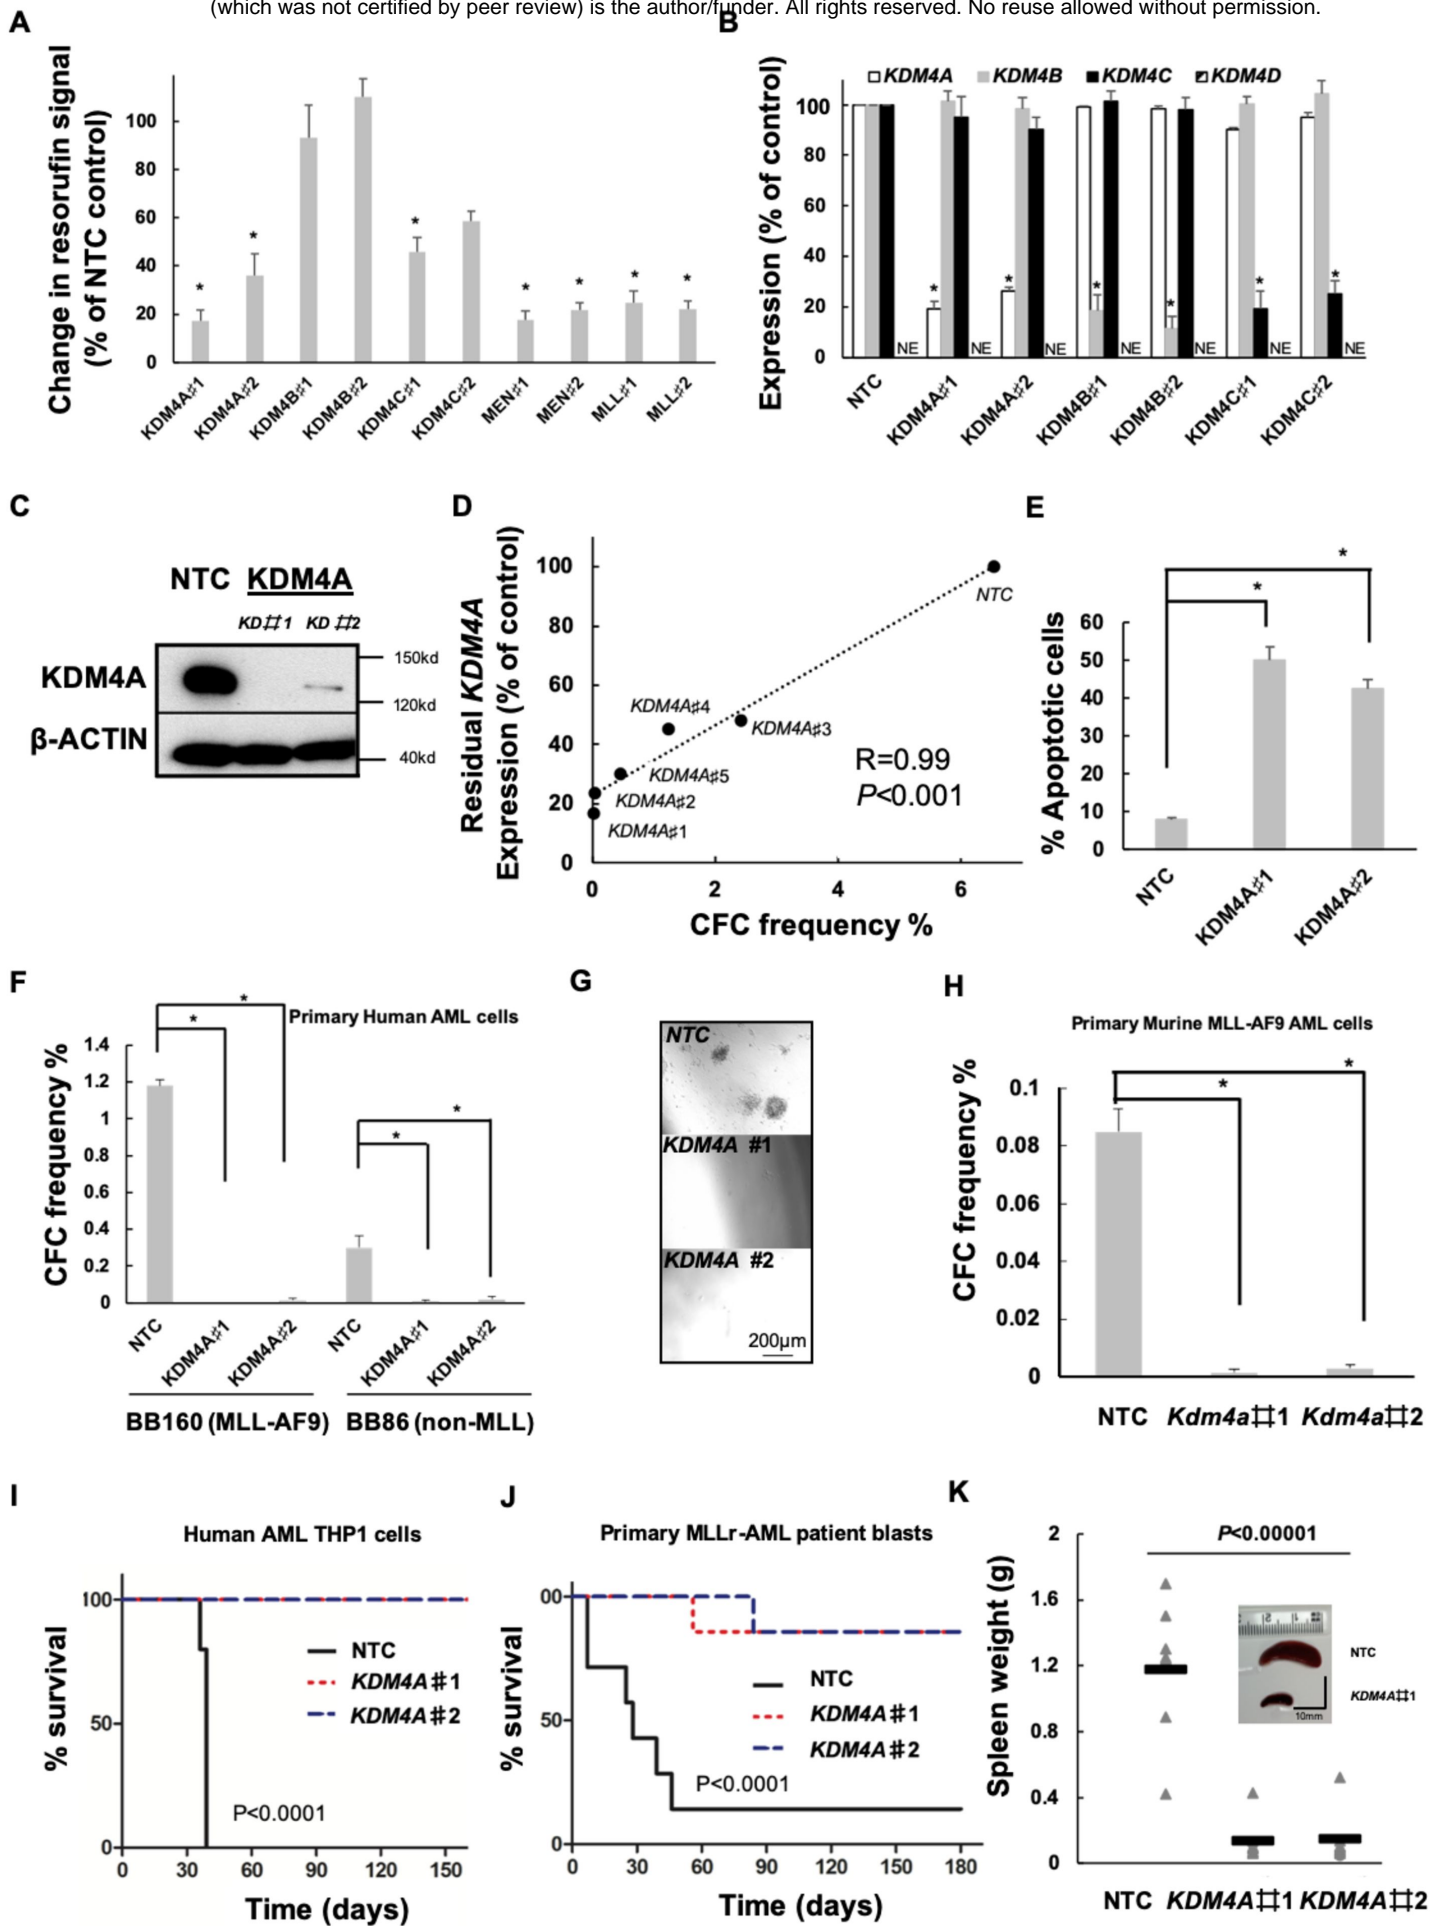

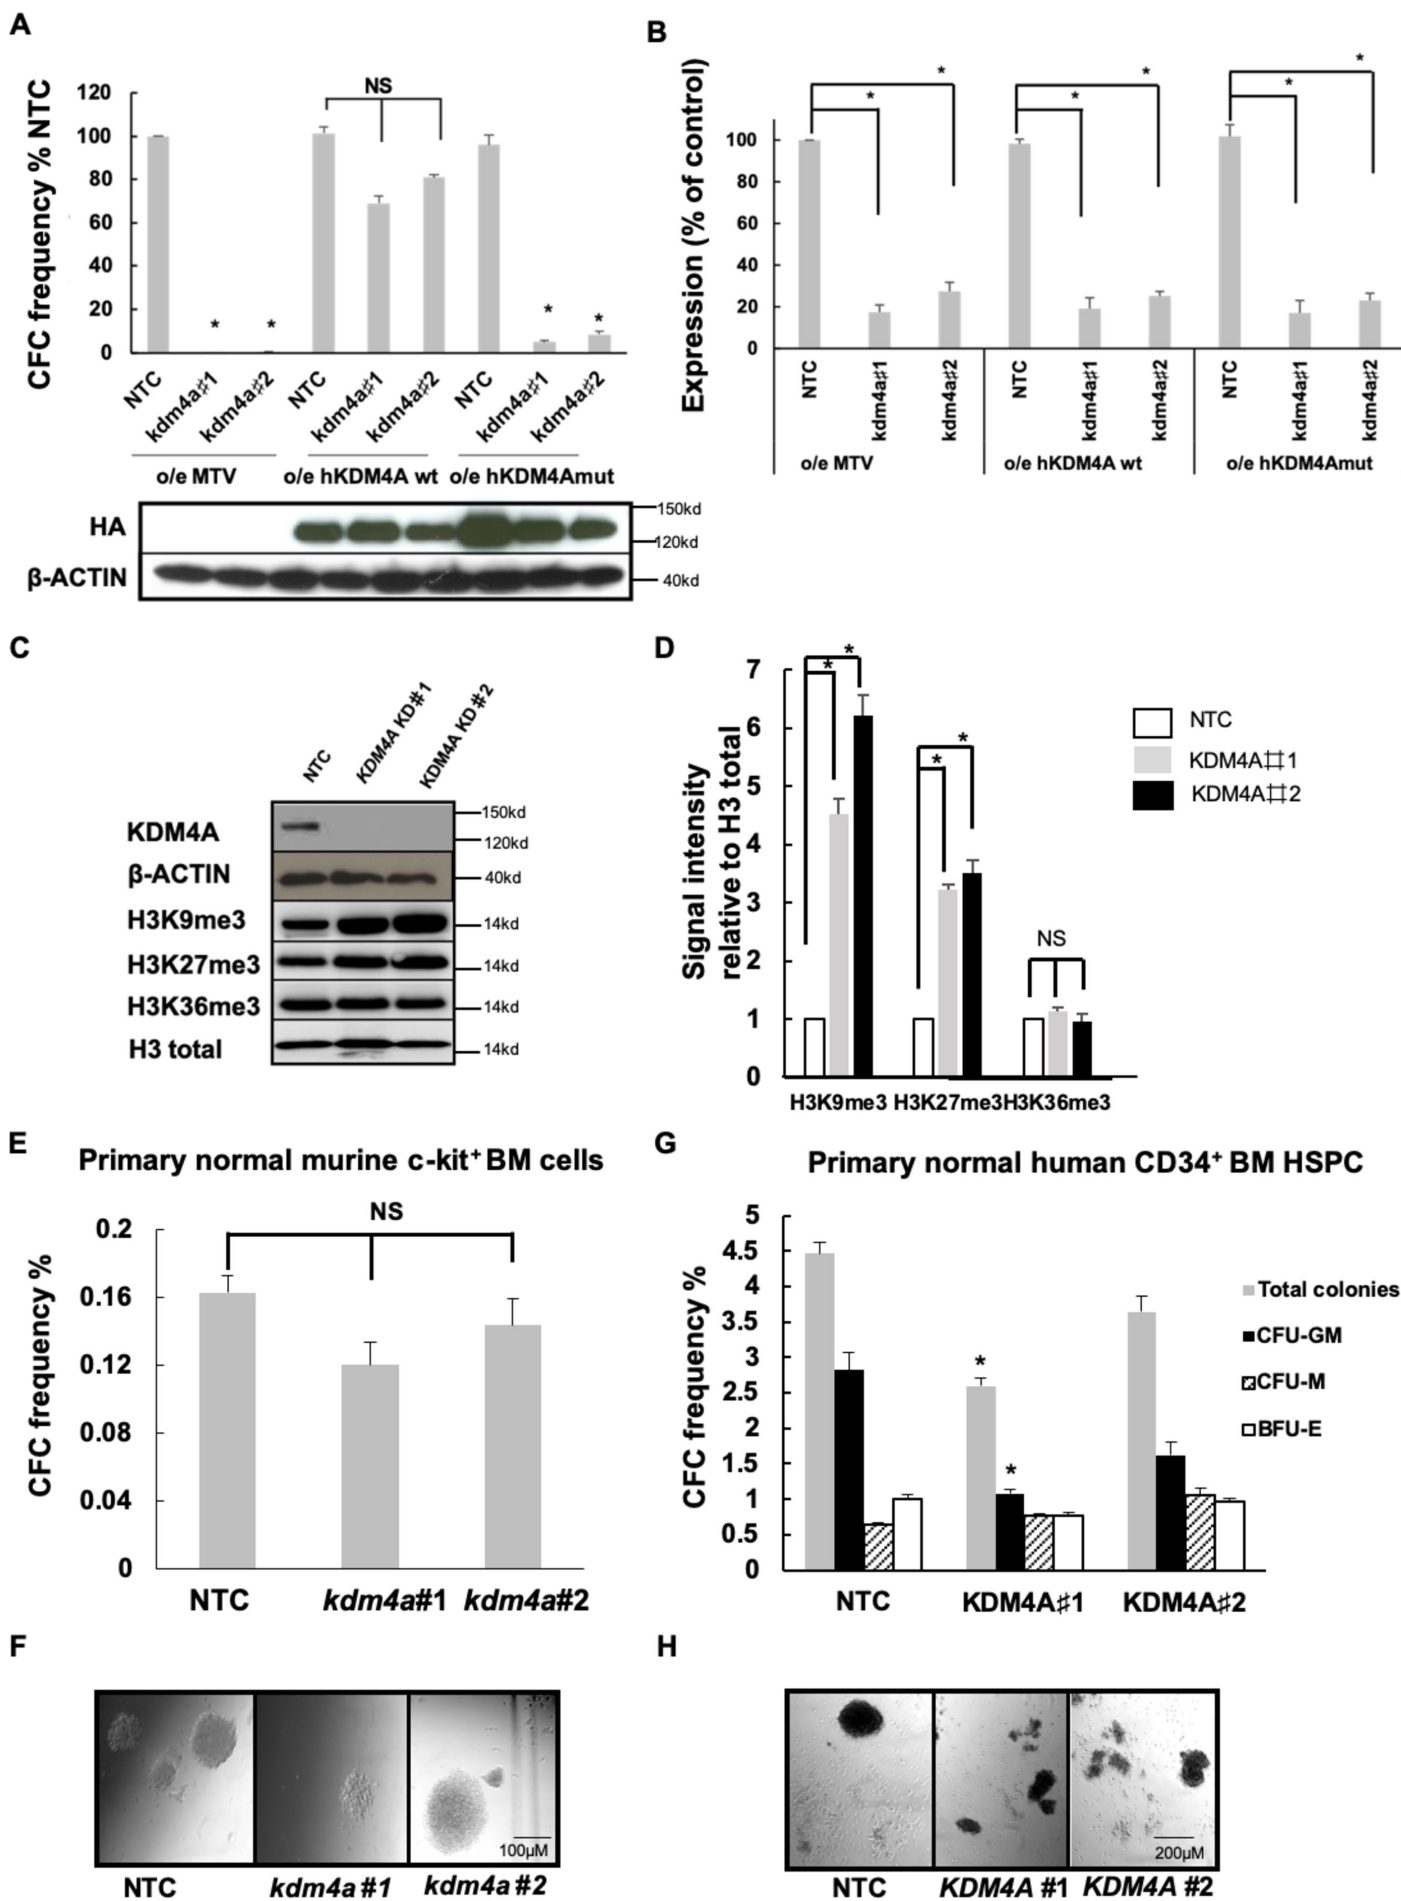

**Figure 3**

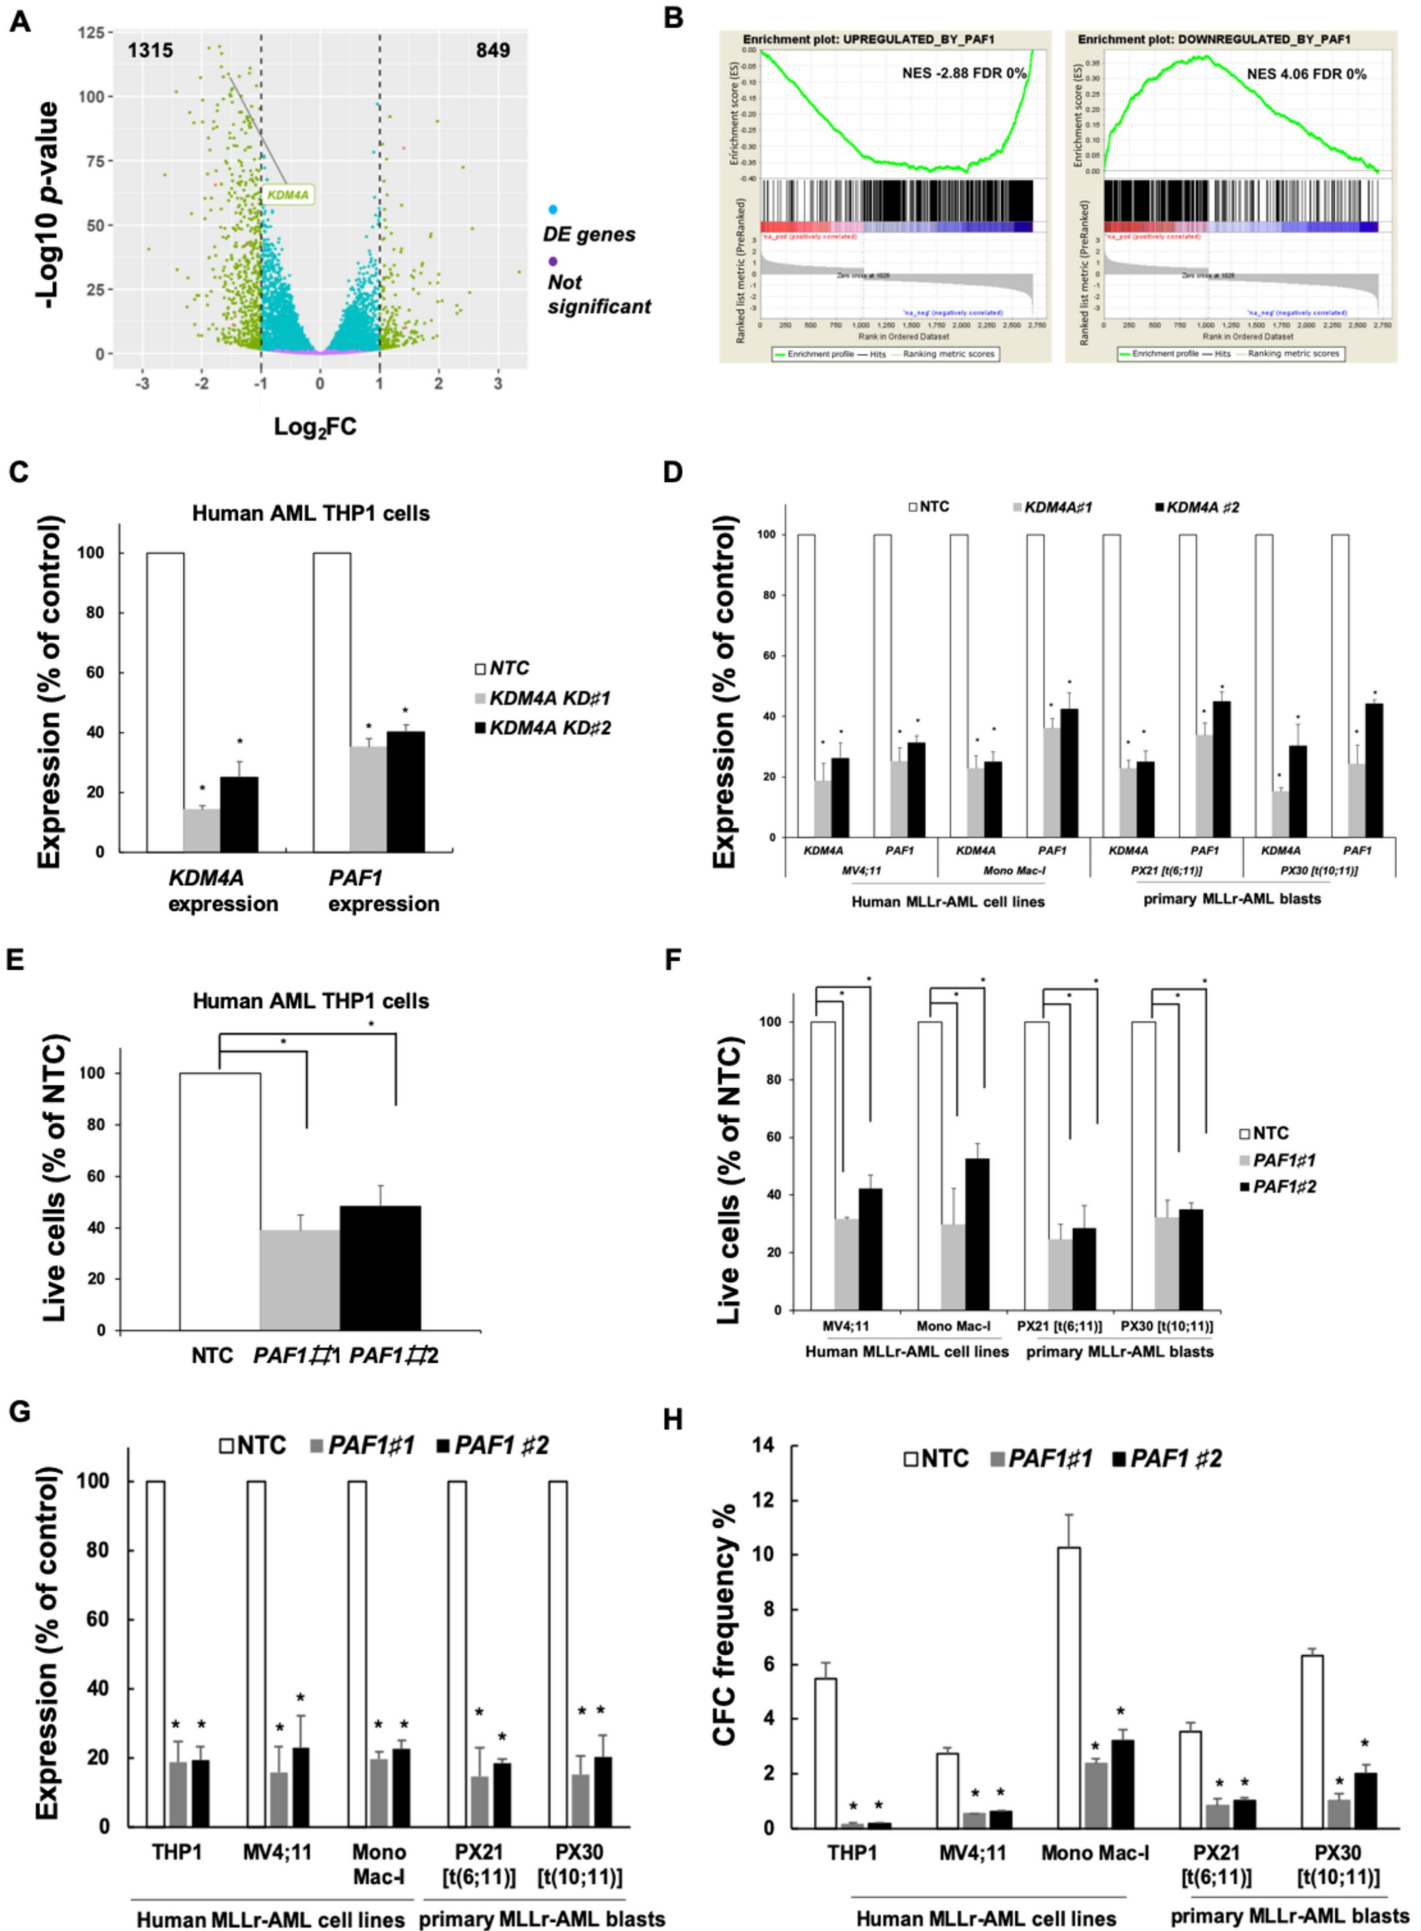



**Figure 4**

**A** bioRxiv preprint doi: <https://doi.org/10.1101/2020.10.30.361881>; this version posted October 30, 2020. The copyright holder for this preprint (which was not certified by peer review) is the author/funder. All rights reserved. No reuse allowed without permission.

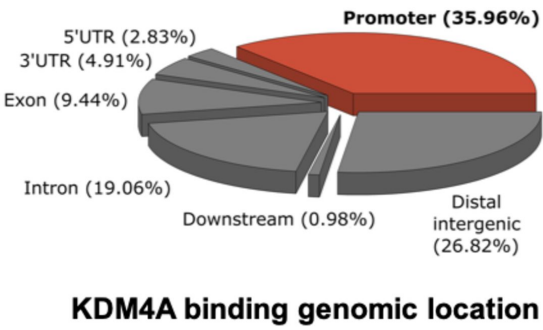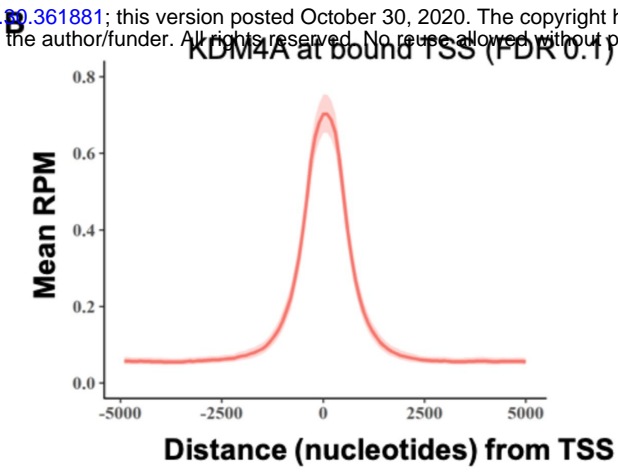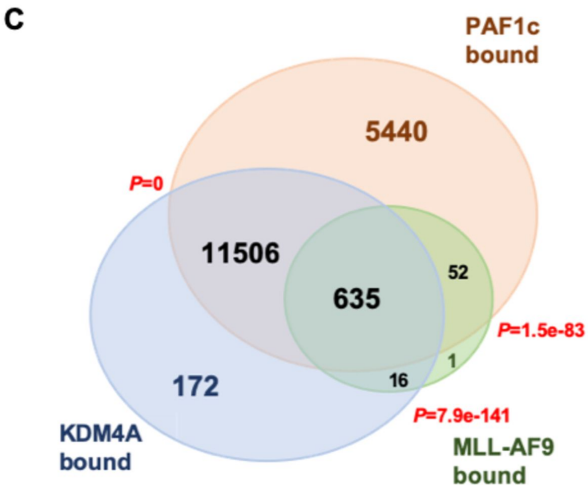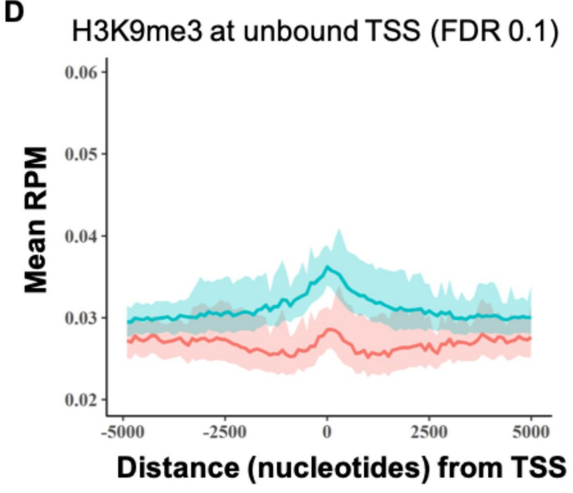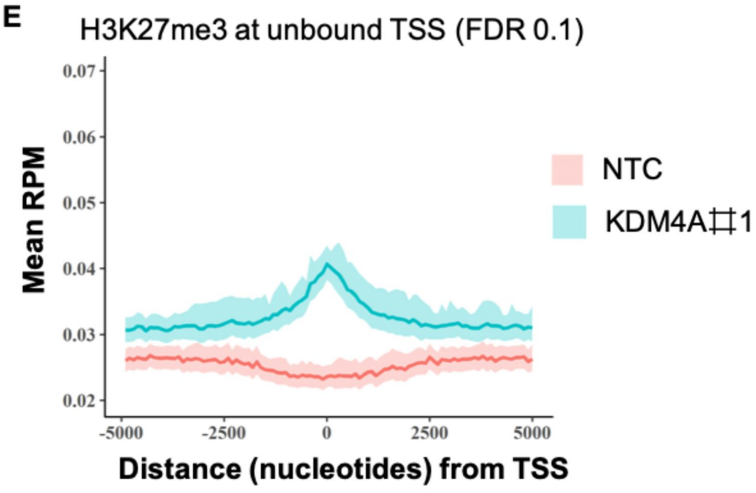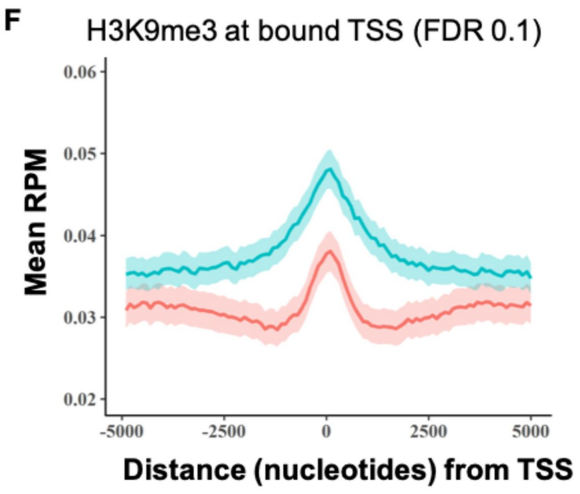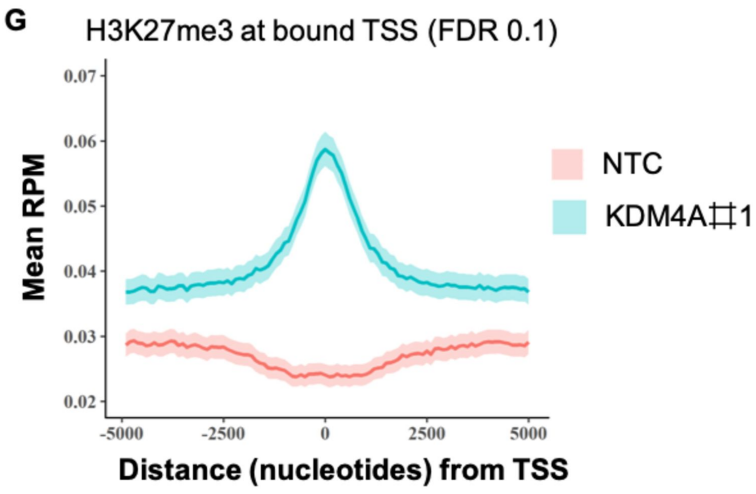



## Figure 5

**A**

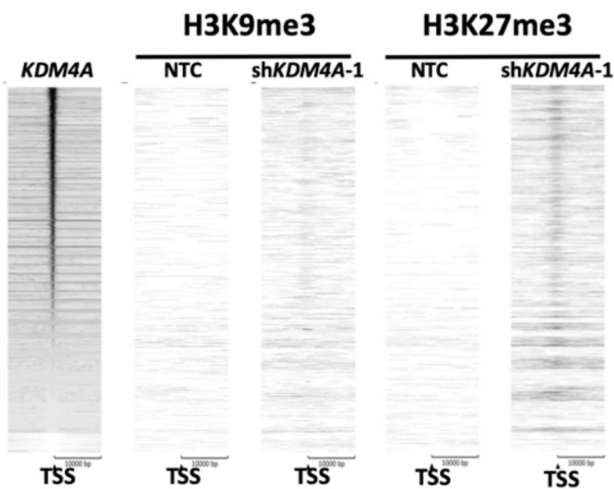

**B**

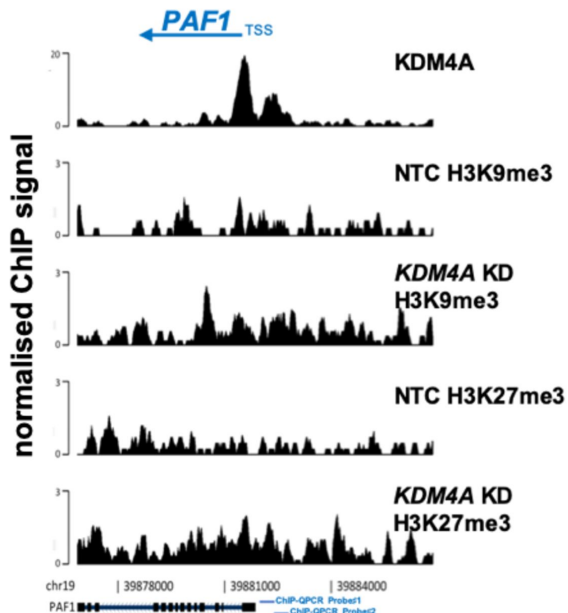

**C**

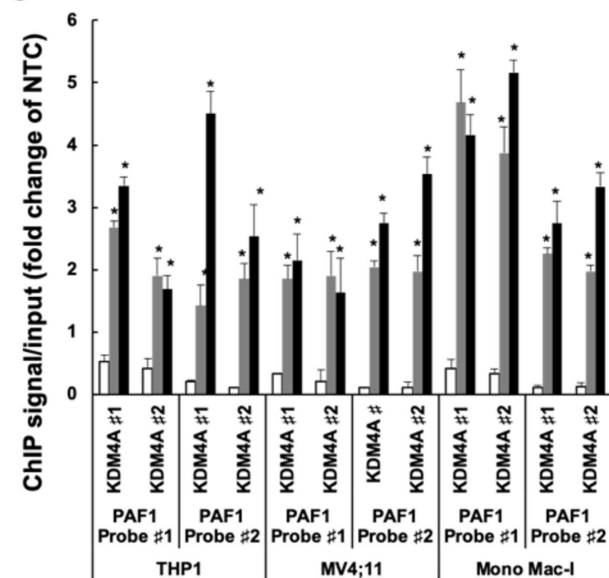

**D**

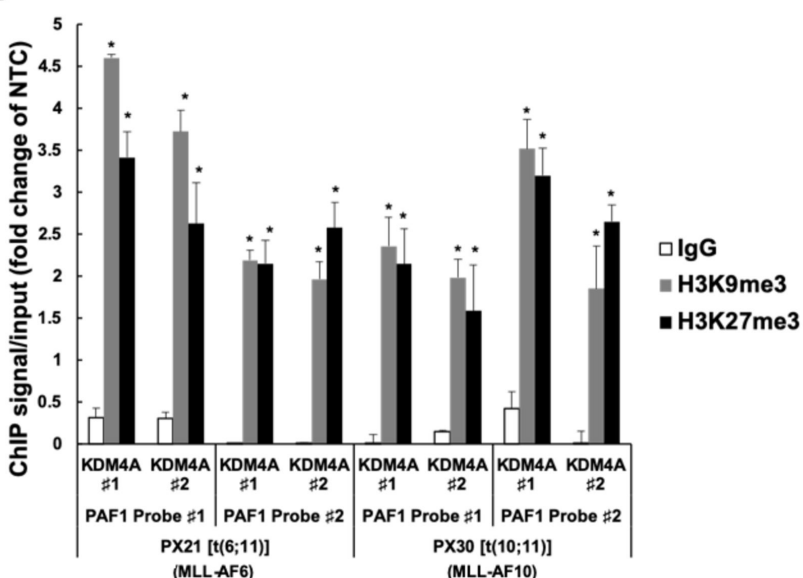

**E**

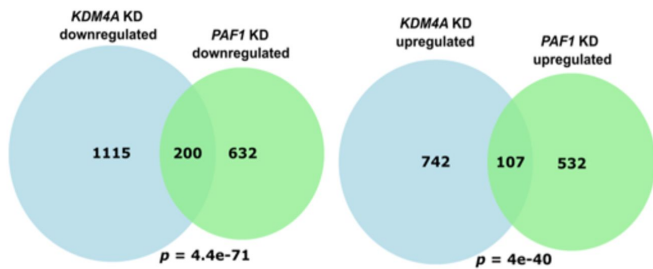

**F**

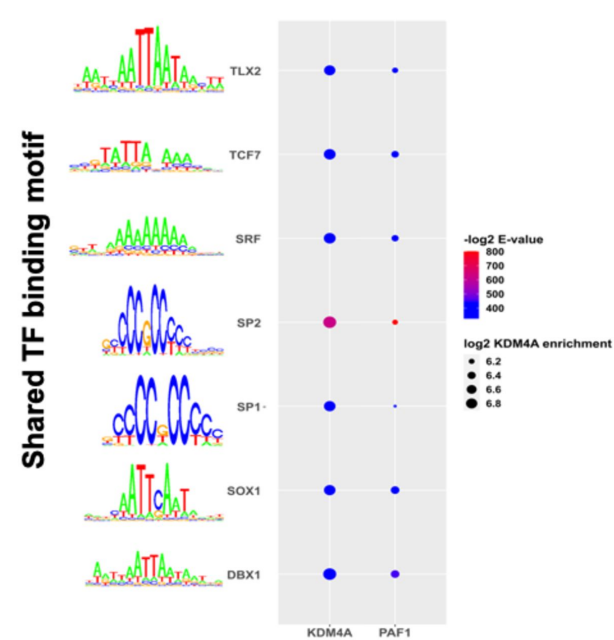

**G**

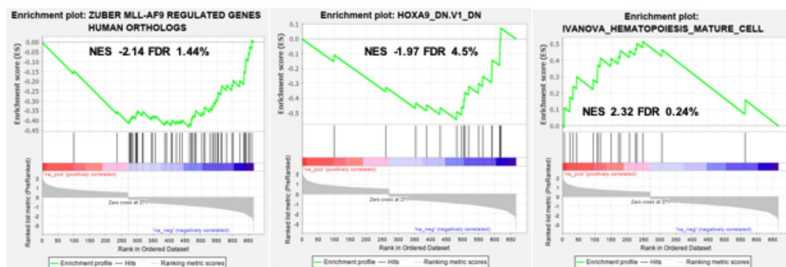

**Figure 6**

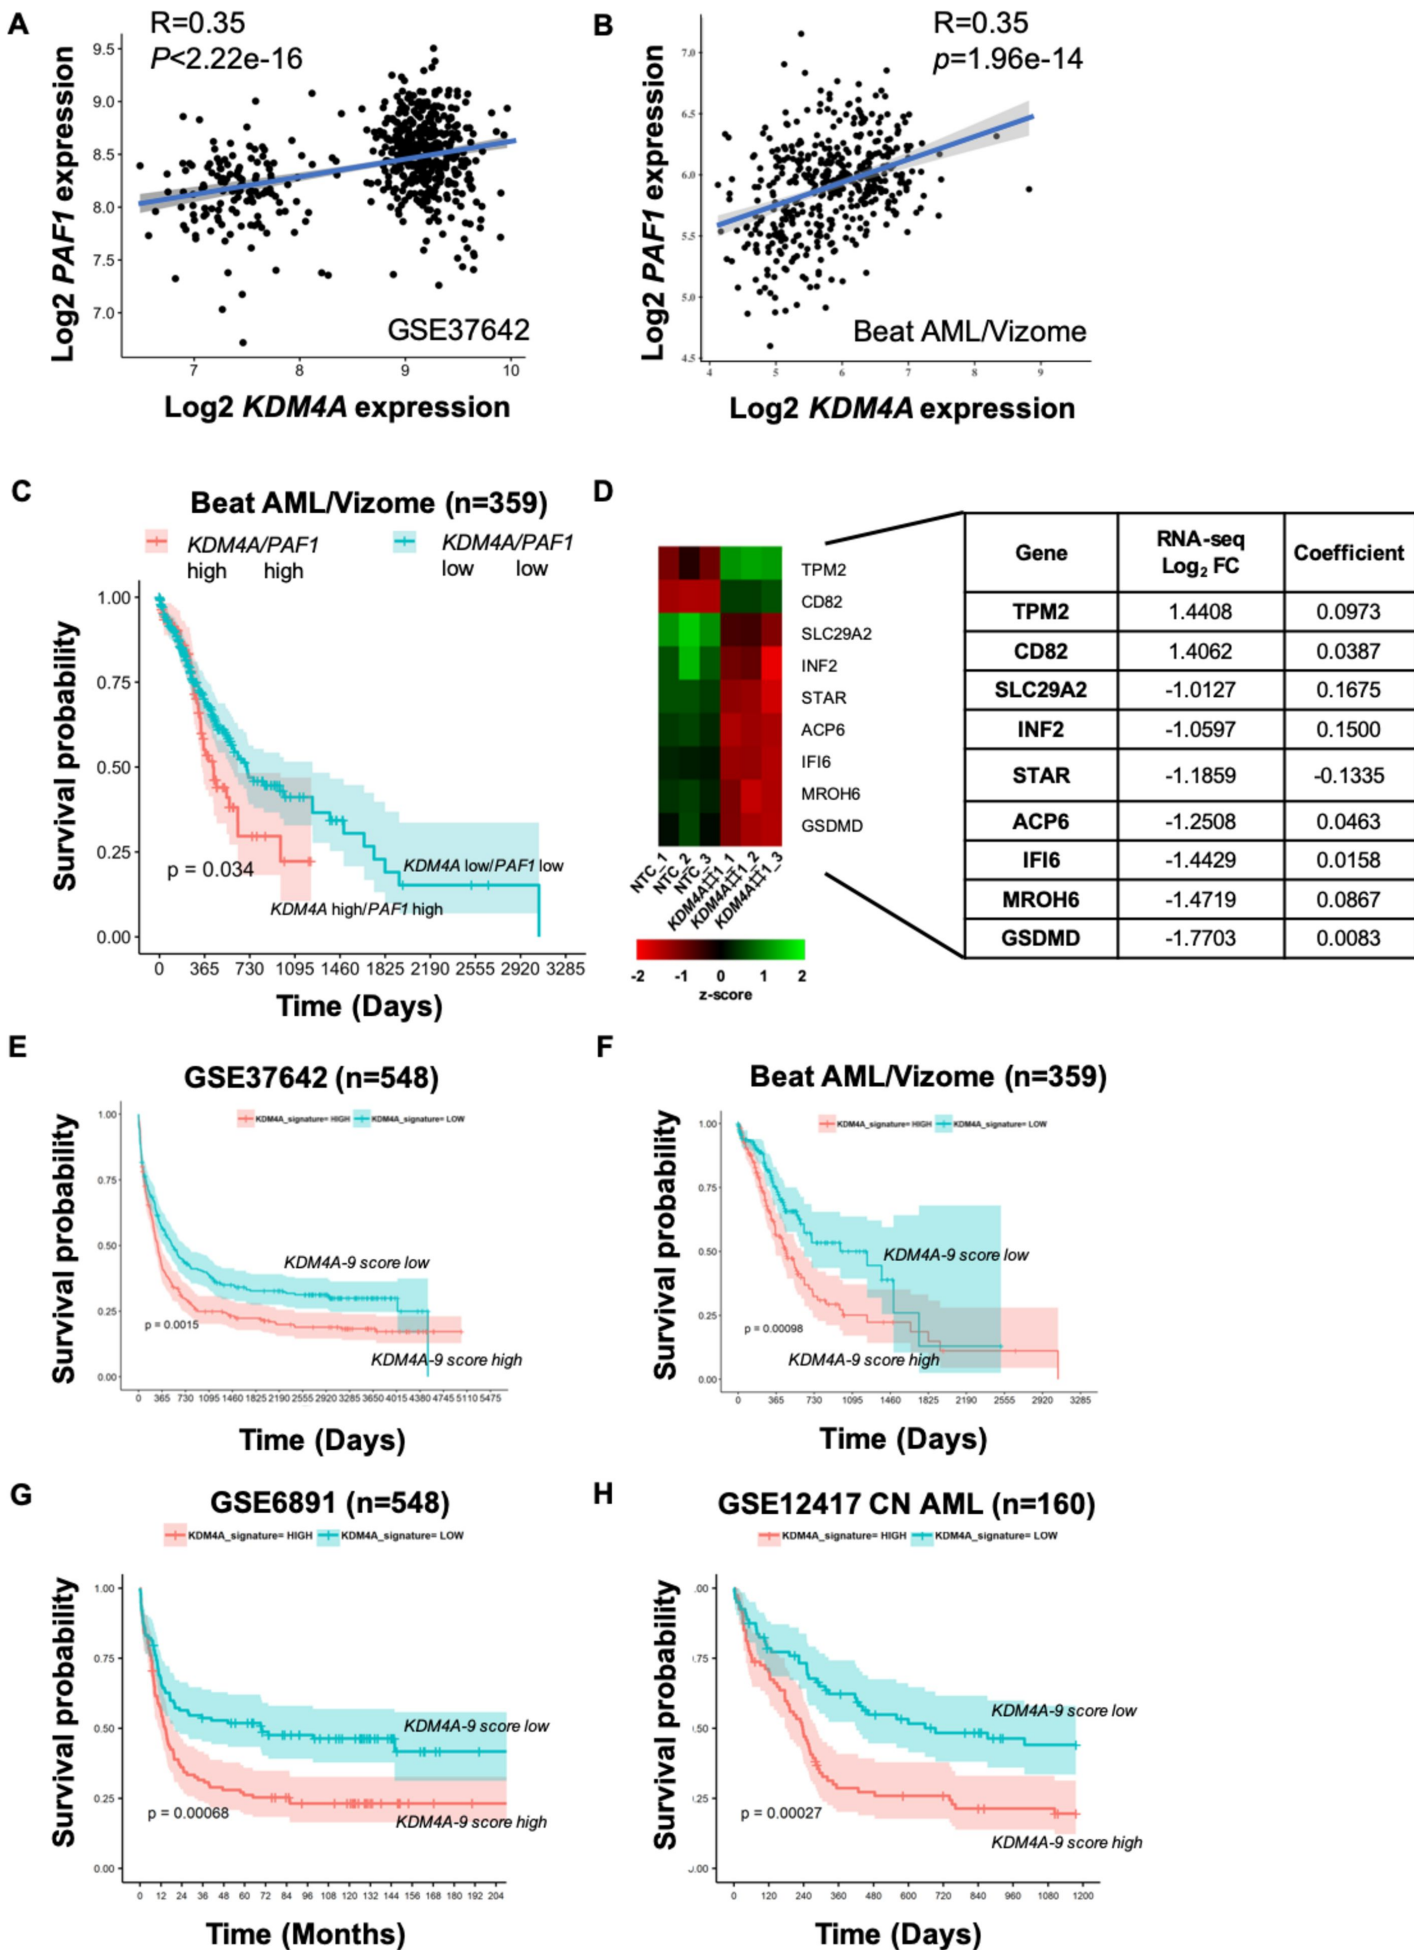

**Figure 7**

**A**

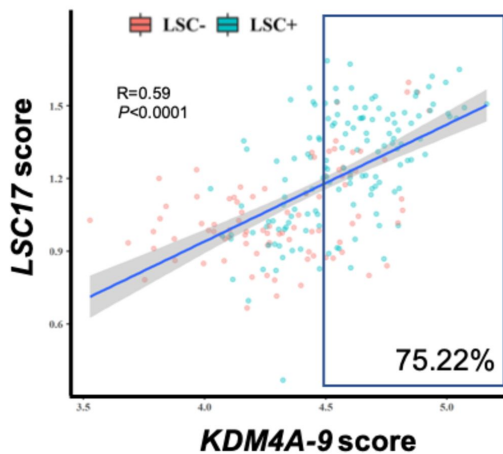

**B**

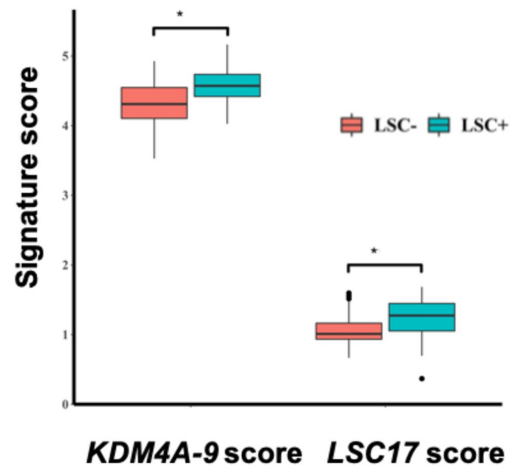

**C**

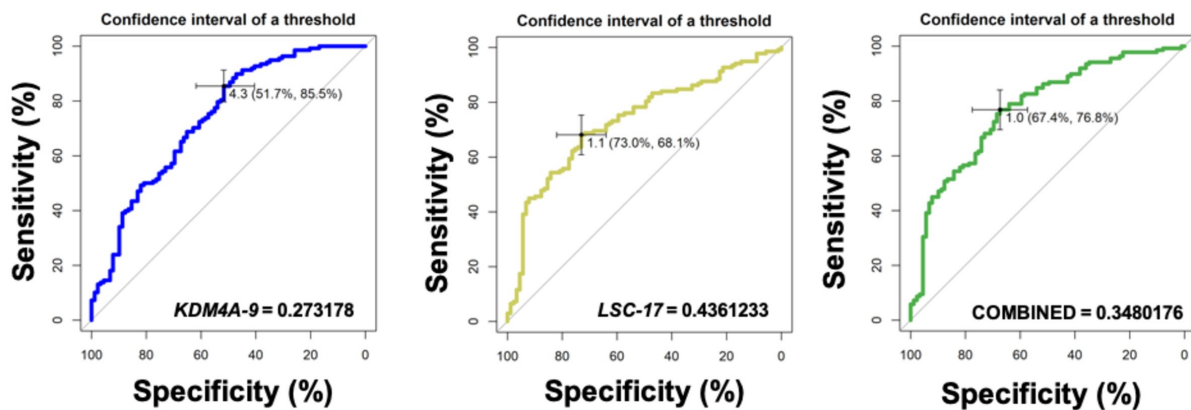

**E**

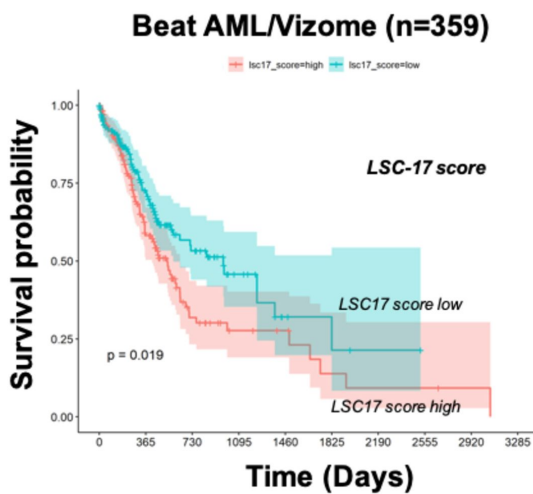

**F**

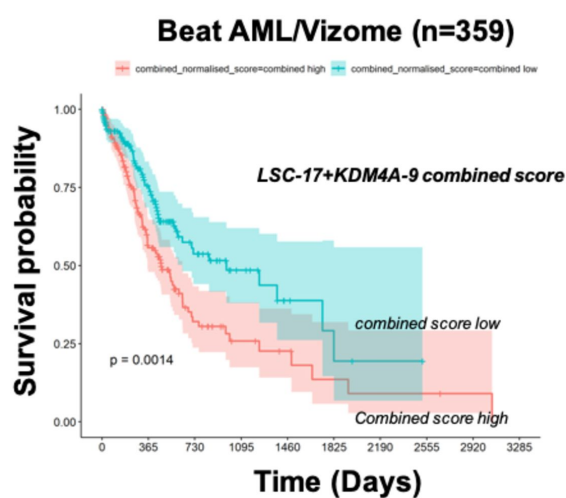

**Figure 8**

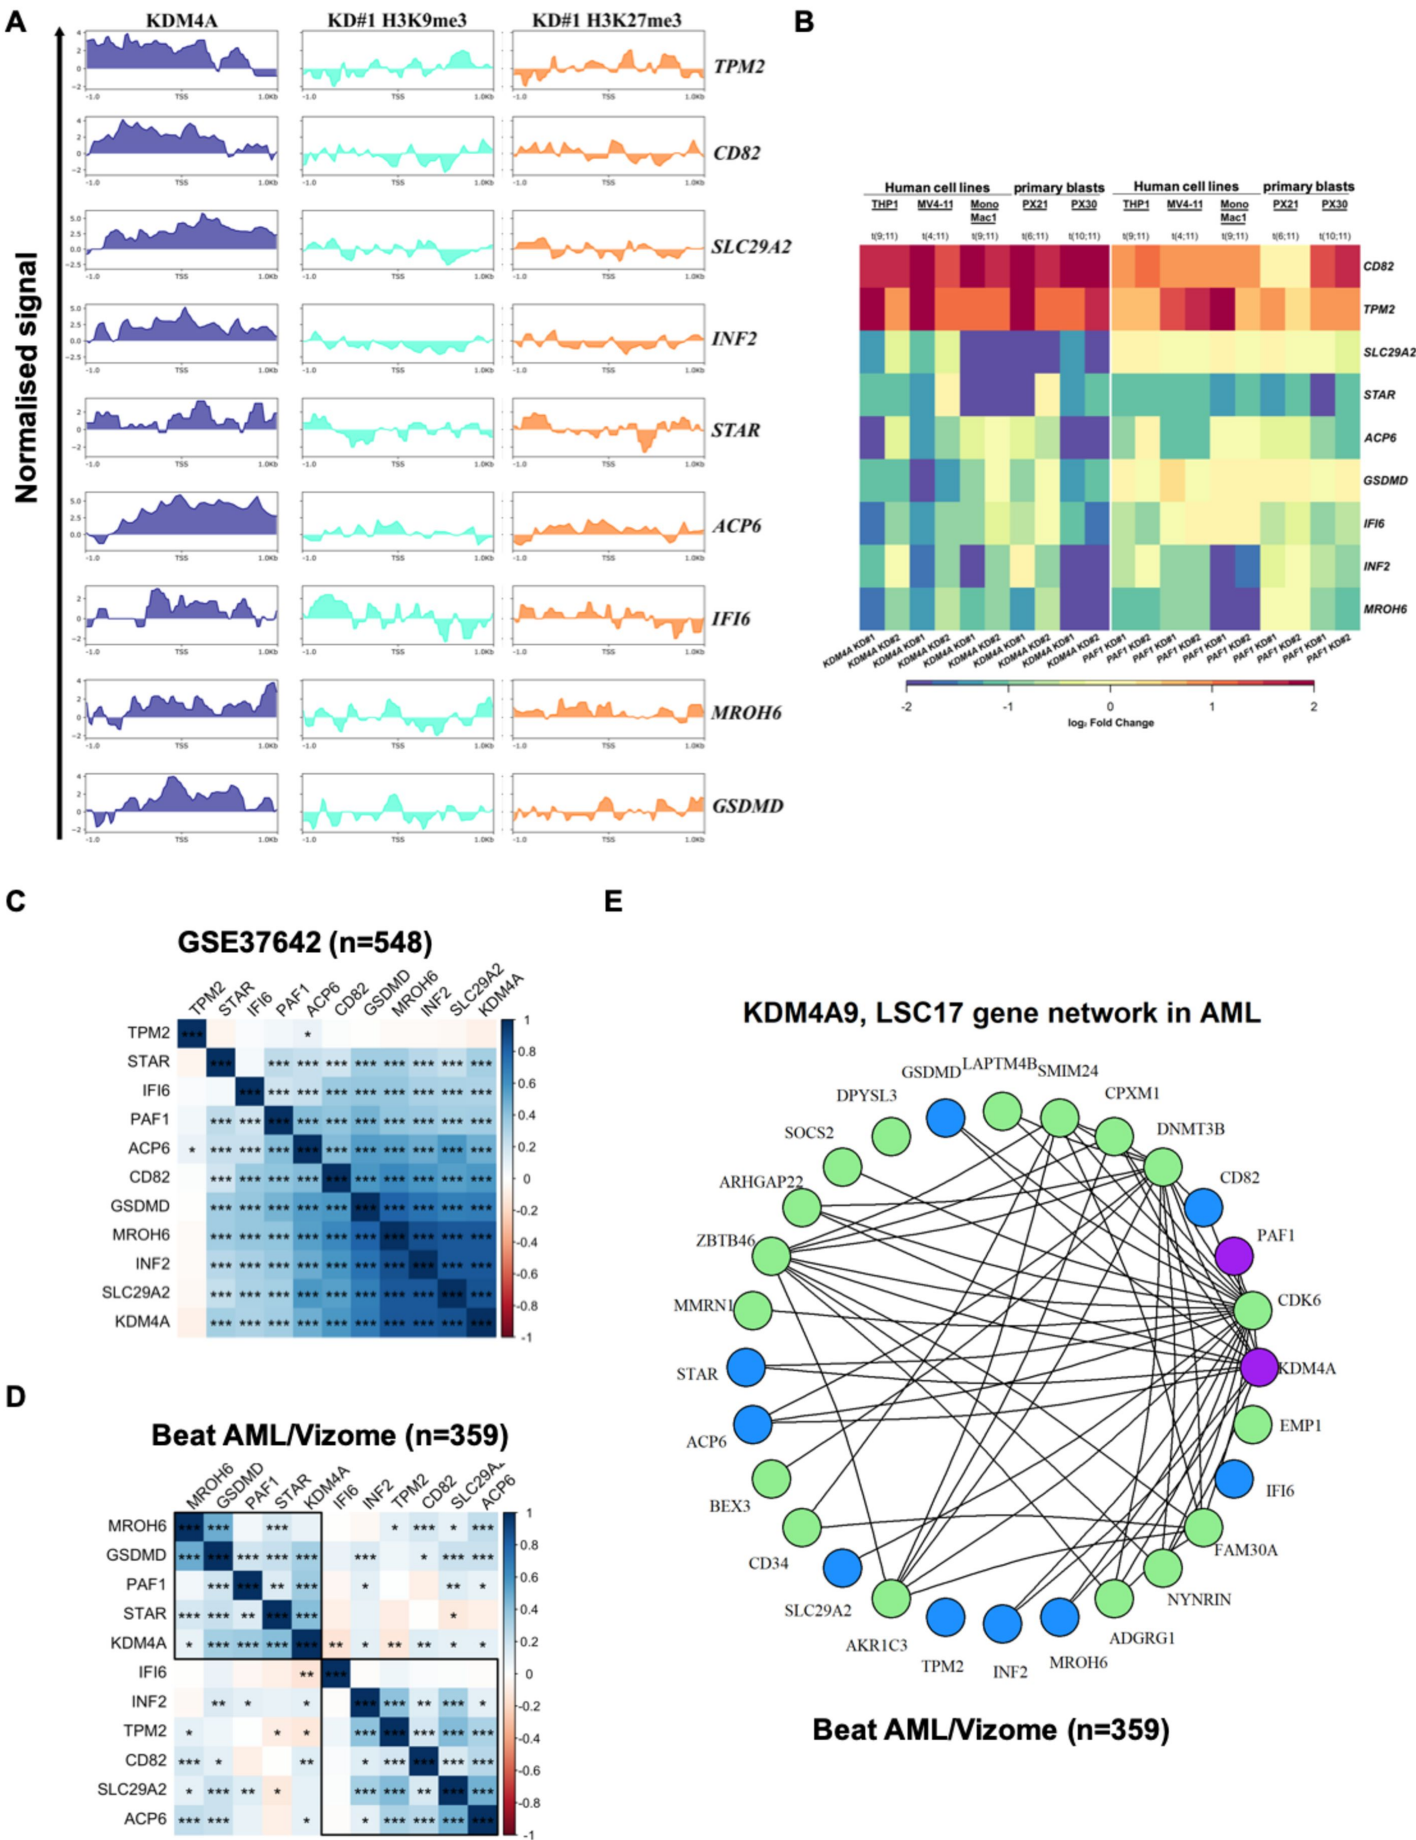

Source: https://www.biorxiv.org/content/biorxiv/early/2020/10/30/2020.10.30.361881.full.pdf
